# Supplementary material for: Factors governing the protonation of Keggin-type polyoxometalates: influence of the core structure in clusters
Source: Royal Society of Chemistry journal article supplement (doi:10.1039/d4dt00799a), 2024-01-01
Supplement: d4dt00799a1.pdf [file d4dt00799a1.pdf]

## Electronic Supporting information

### Factors Governing Protonation of Keggin-type Polyoxometalates: Influence of Core Structure in Clusters

Hiroshi Sampei<sup>a</sup>, Hiromu Akiyama<sup>a</sup>, Koki Saegusa<sup>a</sup>, Masahiro Yamaguchi<sup>a</sup>, Shuhei Ogo<sup>b,c</sup>, Hiromi Nakai<sup>d</sup>, Tadaharu Ueda<sup>\*b,c,e</sup>, and Yasushi Sekine<sup>\*a</sup>

a. Department of Applied Chemistry, Waseda University, 3-4-1, Okubo, Shinjuku, Tokyo, 169-8555, Japan, E-mail ysekine@waseda.jp

b. Department of Marine Resource Science, Faculty of Agriculture and Marine Science, Kochi University, Nankoku783-8502, Japan

c. Marine Core Research Institute, Kochi University, Nankoku 783–8502, Japan

d. Department of Chemistry and Biochemistry, Waseda University, 3-4-1, Okubo, Shinjuku, Tokyo, 169-8555, Japan

e. MEDi center, Kochi University, Kochi 780-0842, Japan

#### **This file includes:**

Figs. S1 to S12

Tables S1 to S5

#### **Other Supplementary Materials for this manuscript include the following:**

.xyz and .chk files (ZIP)

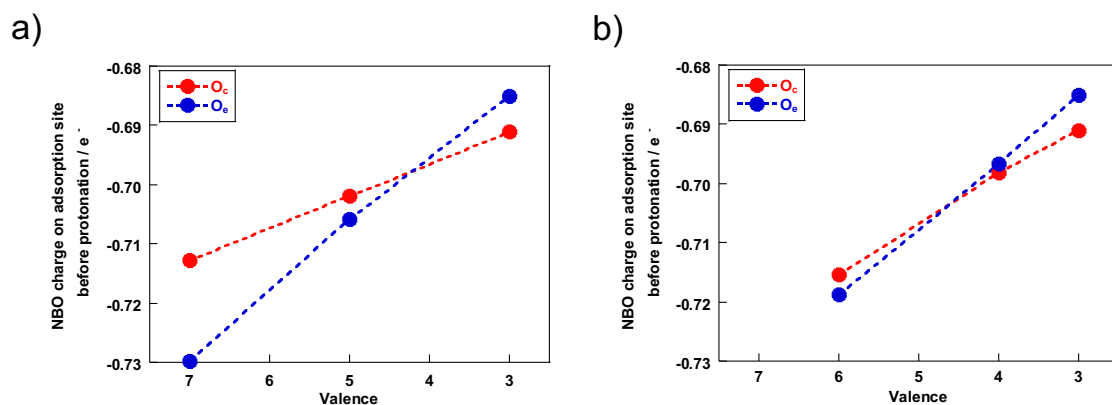

**Figure S1. NBO charge on each adsorption site before protonation in  $\alpha$ -PW12.**

**a) restricted DFT b) unrestricted DFT**

The same trend of amount of charge change as Fig. 2 was observed in not only close shell systems but also open shell systems, indicates this trend of change of  $O_e$  and  $O_c$  occurs regardless of occupation.

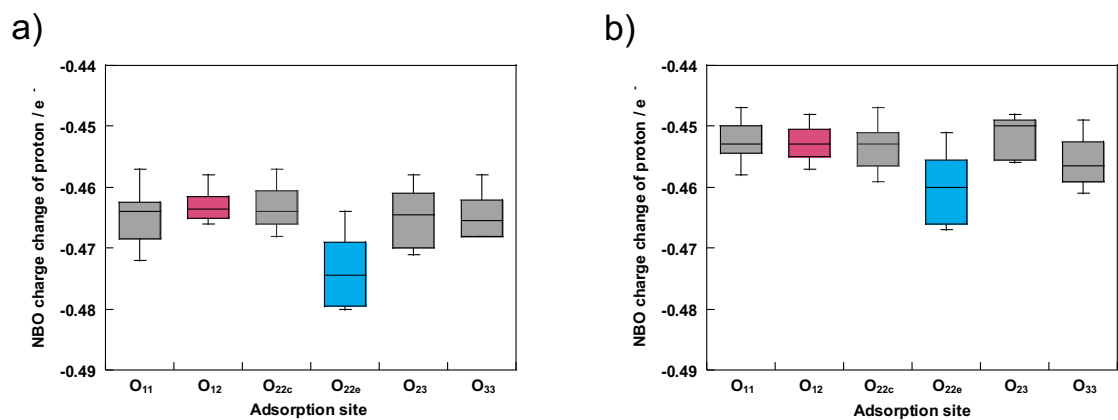

**Figure S2 4** Box plot of NBO charge change of proton upon protonation in a)  $\beta$ -XMo12 and b)  $\beta$ -XW12. The upper and lower whiskers are set as the maximum and minimum values. The plots outside the whisker are outliers.

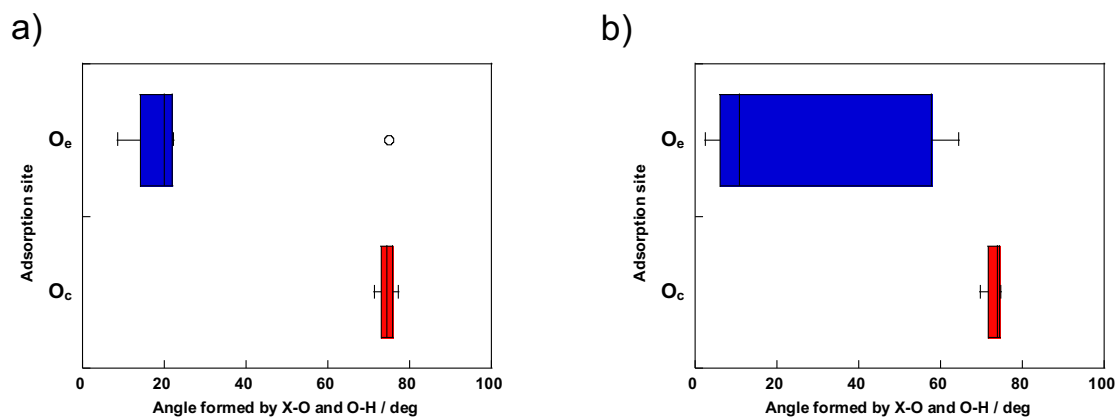

**Figure S3** Box plot illustrating the relationship between adsorption site and protonation angles, angles between X-O and O-H, in a)  $\alpha\text{-XMo}_{12}$  and b)  $\alpha\text{-XW}_{12}$ . The upper and lower whiskers represent the maximum and minimum values. Outlying points outside the whisker are considered as outliers.

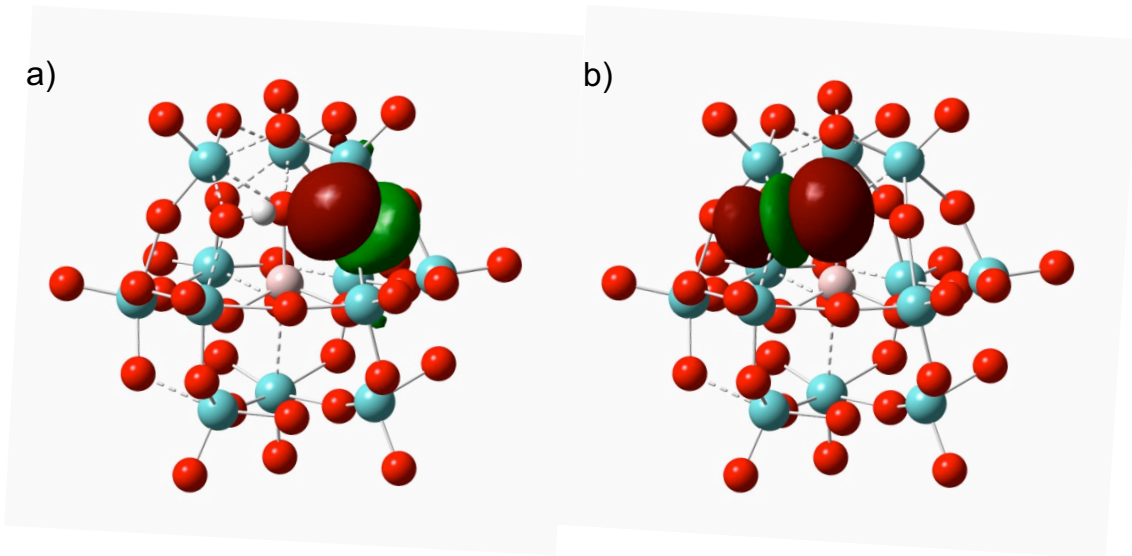

**Figure S4** NBO orbitals of a) donor level and b) acceptor level for proton adsorption on  $O_{12}$  site in  $\beta$ - $AlMo_{12}$ .

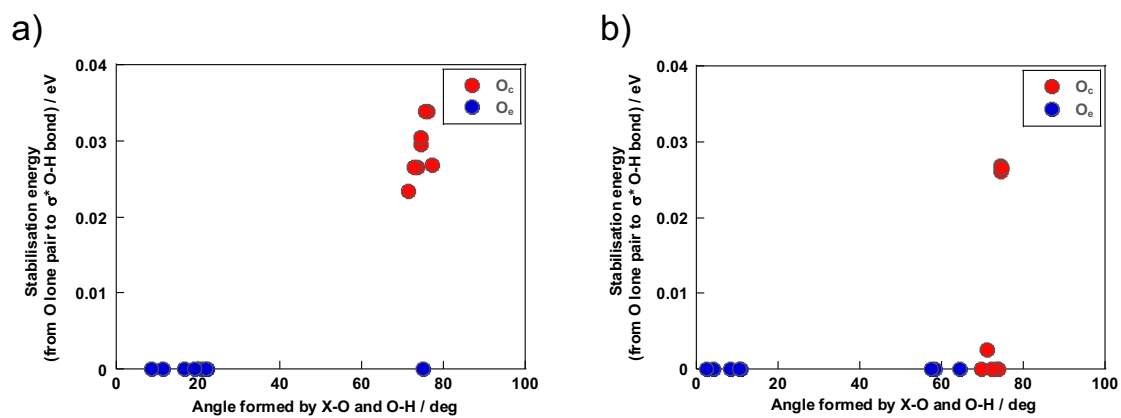

Figure S5 Relationship between stabilization energy and the protonation angles, angles between X-O and O-H, in a)  $\alpha$ -XMo<sub>12</sub> and b)  $\alpha$ -XW<sub>12</sub>.

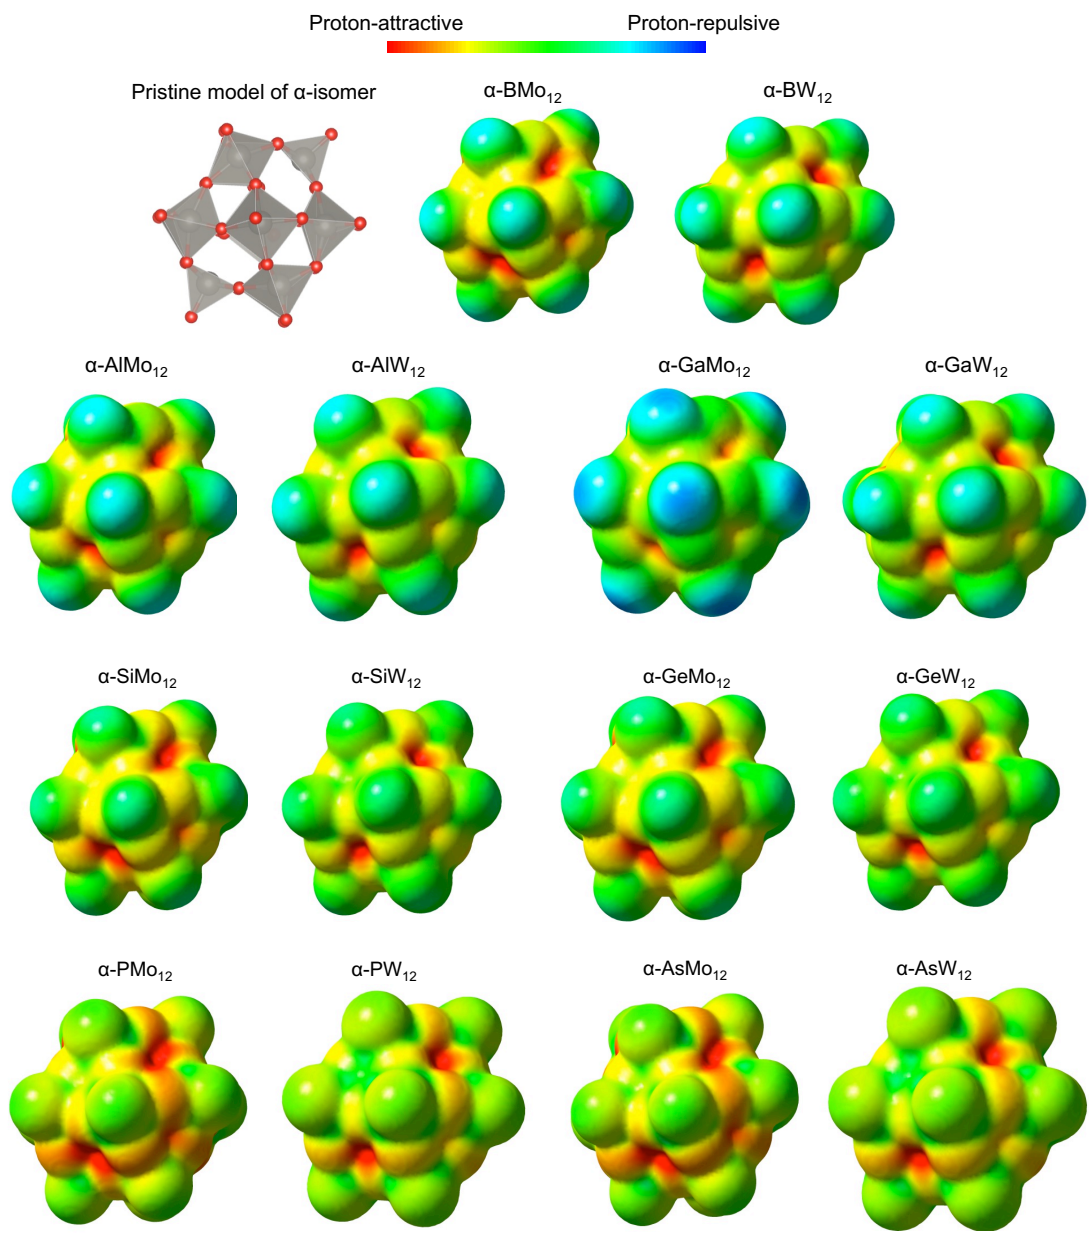

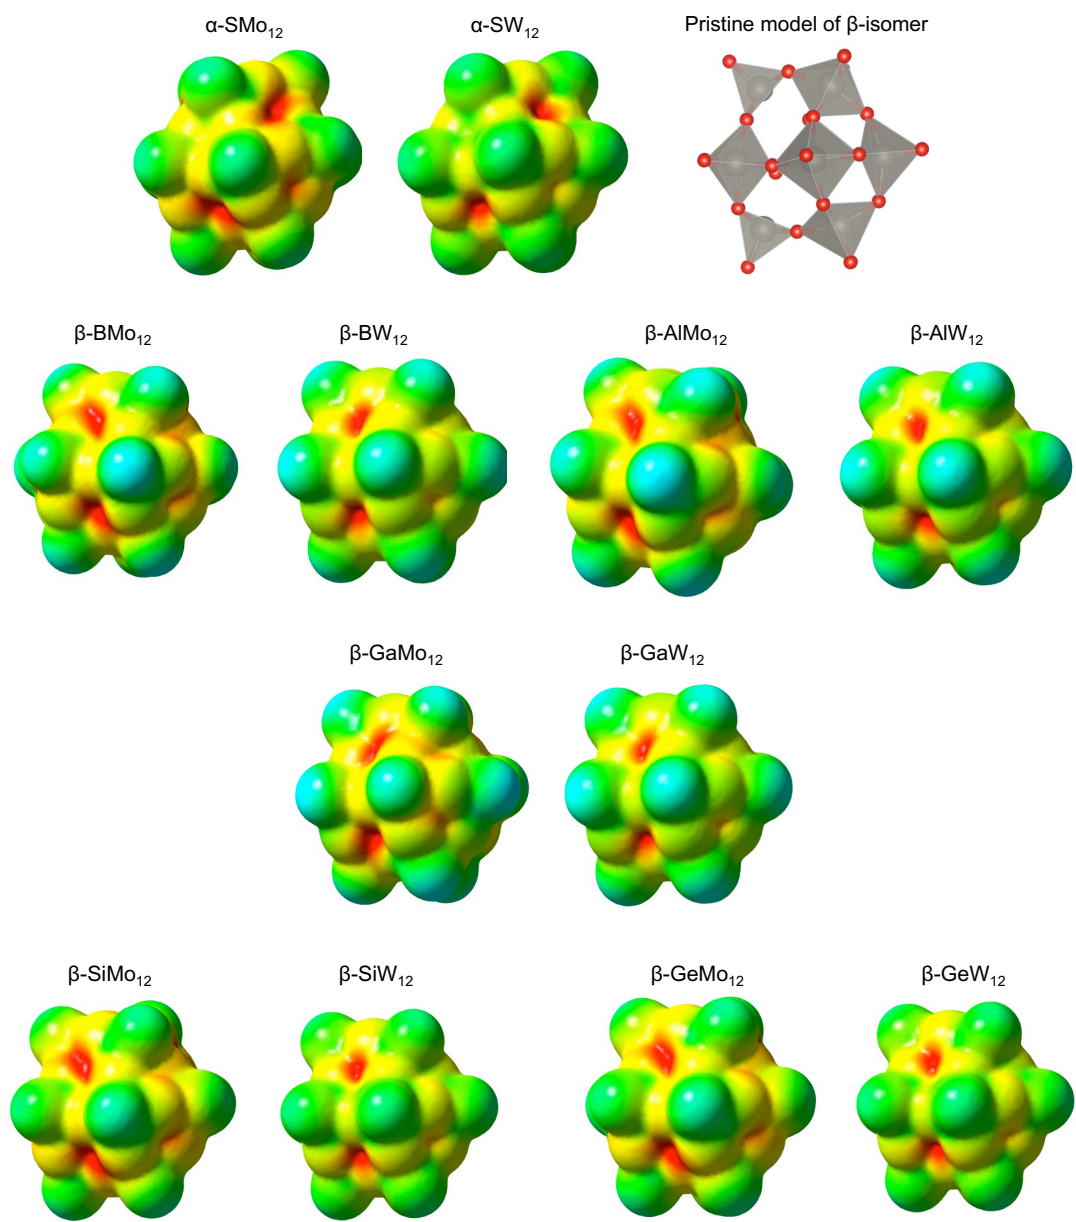



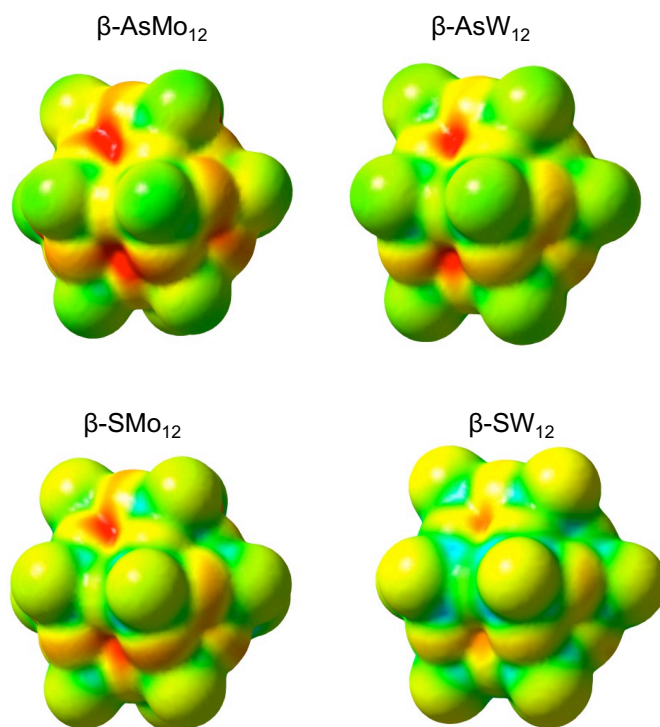

**Figure S6 MEP mappings of  $\alpha$ - and  $\beta$ - XM<sub>12</sub> except for  $\beta$ -PM<sub>12</sub>.**

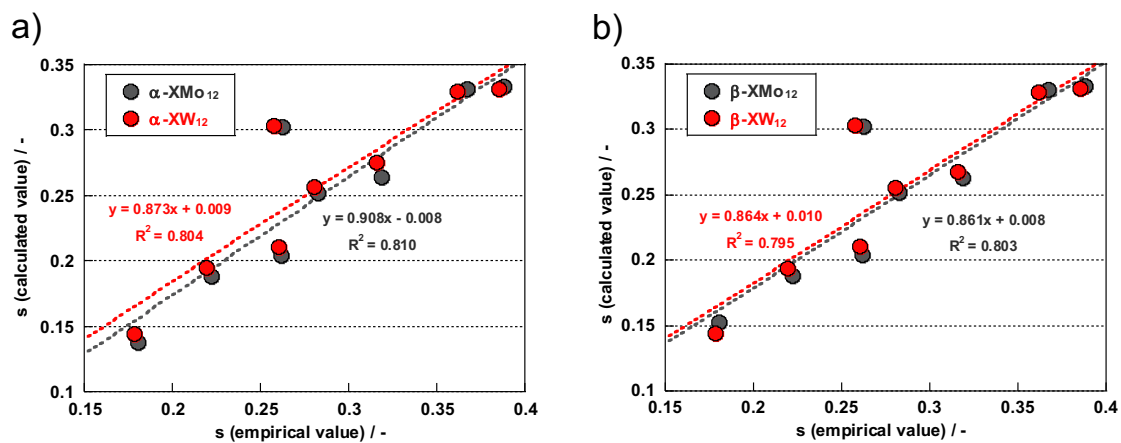

Figure S7 Correlation between empirical and calculated bond strength values on a)  $\alpha$ -XM<sub>12</sub> and b)  $\beta$ -XM<sub>12</sub>.

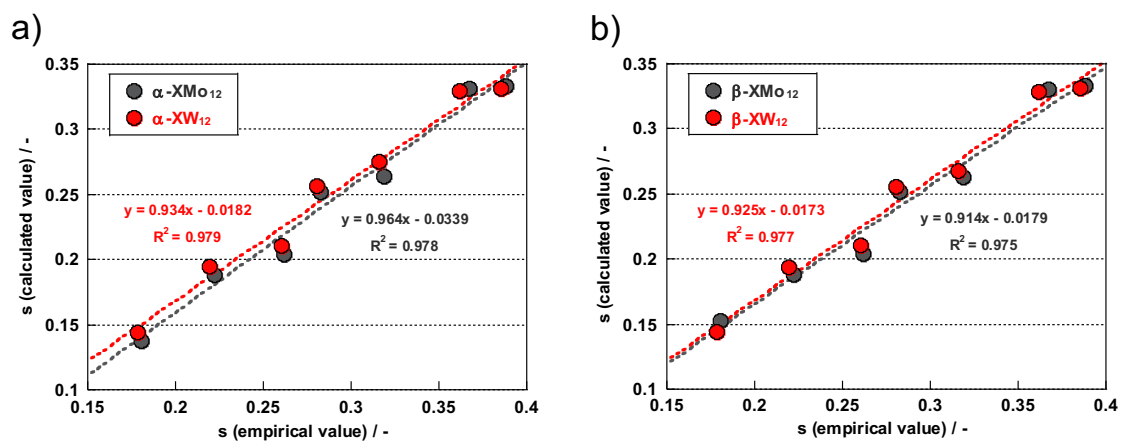

Figure S8 Correlation between empirical and calculated bond strength values except X=B a) on  $\alpha$ -XM<sub>12</sub> and b) on  $\beta$ -XM<sub>12</sub>.

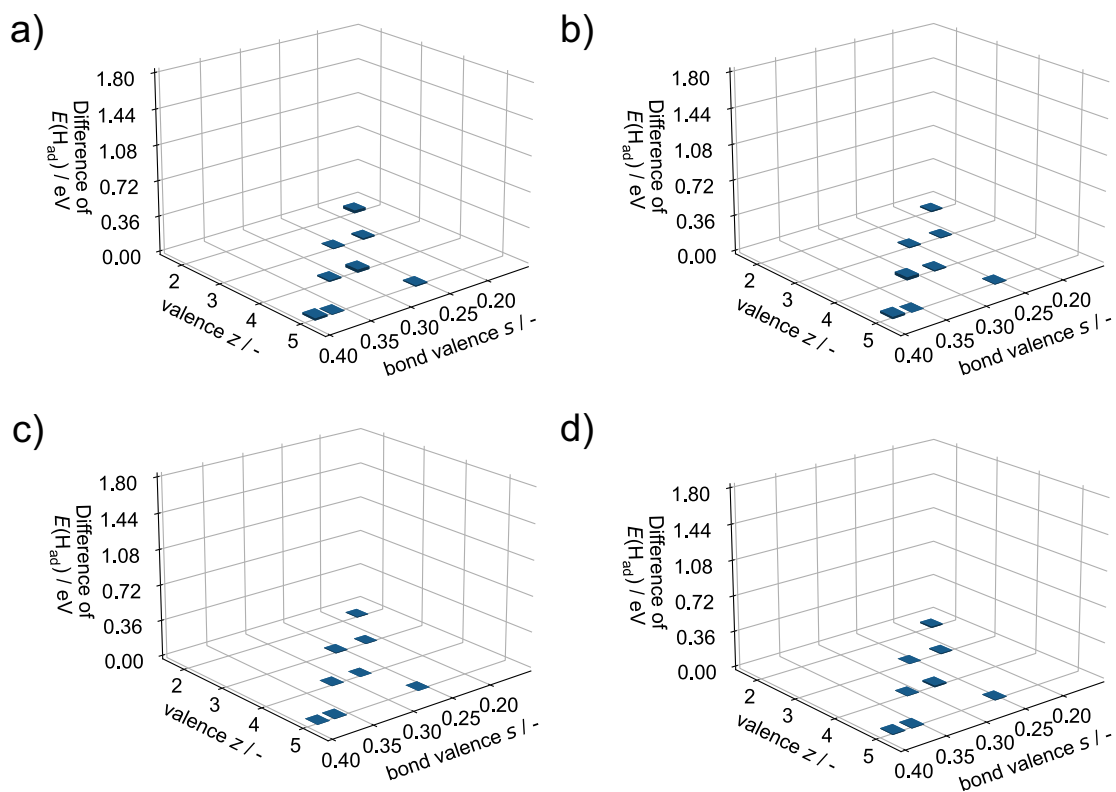

**Figure S9 Absolute error of predicted protonation energy in a)  $\alpha$ -XMo<sub>12</sub>, b)  $\alpha$ -XW<sub>12</sub>, c)  $\beta$ -XMo<sub>12</sub>, and d)  $\beta$ -XW<sub>12</sub>. The width of axis corresponding to absolute error (from 0.0 to 1.8) is adjusted to the same as the drawn width of  $E(H_{ad})$  in Fig. 8 (from -10.6 to -12.4).**

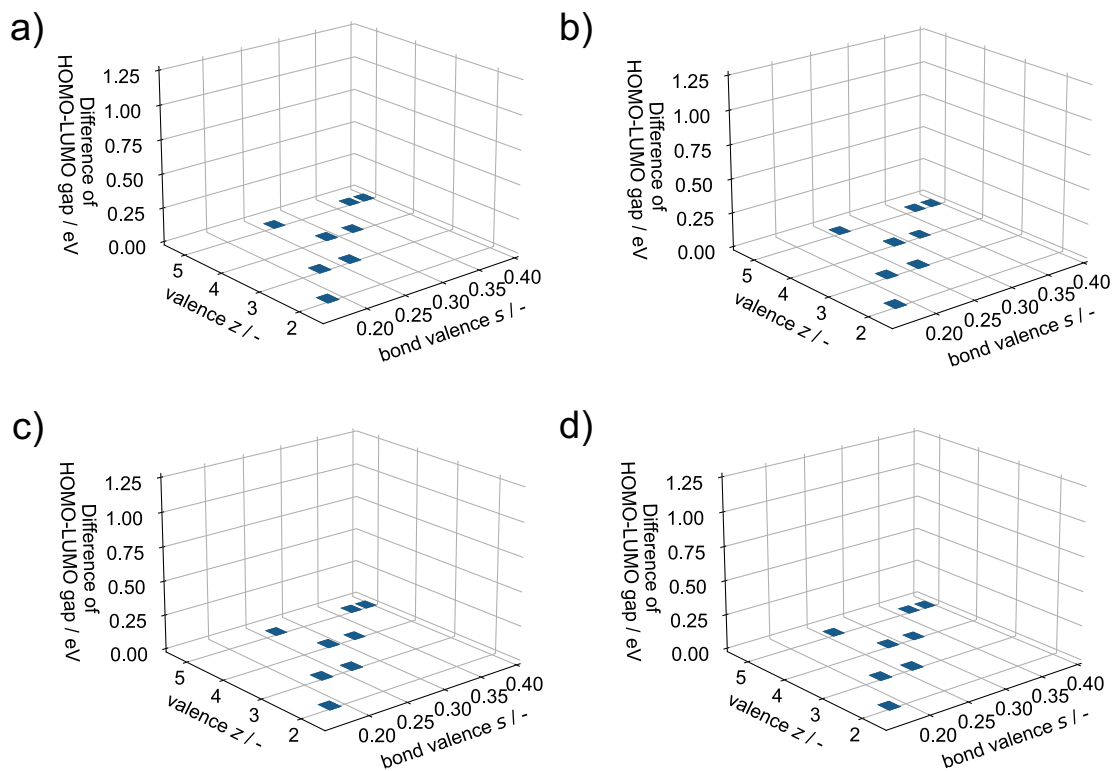

**Figure S10** Absolute error of predicted HOMO-LUMO gap in a)  $\alpha$ - $\text{XMo}_{12}$ , b)  $\alpha$ - $\text{XW}_{12}$ , c)  $\beta$ - $\text{XMo}_{12}$ , and d)  $\beta$ - $\text{XW}_{12}$ . The width of axis corresponding to absolute error (from 0.0 to 1.25) is adjusted to the same as the drawn width of HOMO-LUMO gap in Fig. 9 (from 3.75 to 5.00).

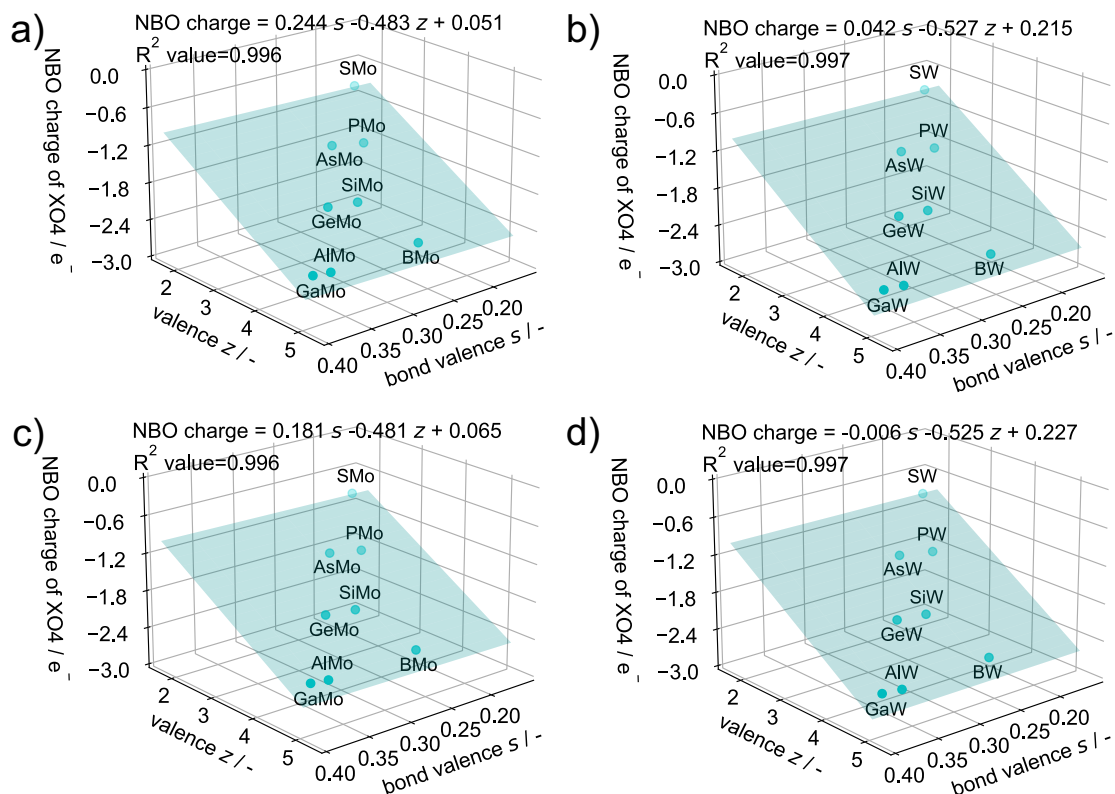

**Figure S11 Regression of NBO charges of  $XO_4$  core structure in a)  $\alpha$ - $XMo_{12}$ , b)  $\alpha$ - $XW_{12}$ , c)  $\beta$ - $XMo_{12}$ , and d)  $\beta$ - $XW_{12}$ .**

We discuss that the valences of POM are derived from charges of  $XO_4$  structure in main text. Moreover, we evaluate the NBO charges of  $XO_4$  structures. The clear relationship between the NBO charges and governing factors for various responses suggests that the governing factors strongly involve degree of electron transfer from core structure to shell structure.

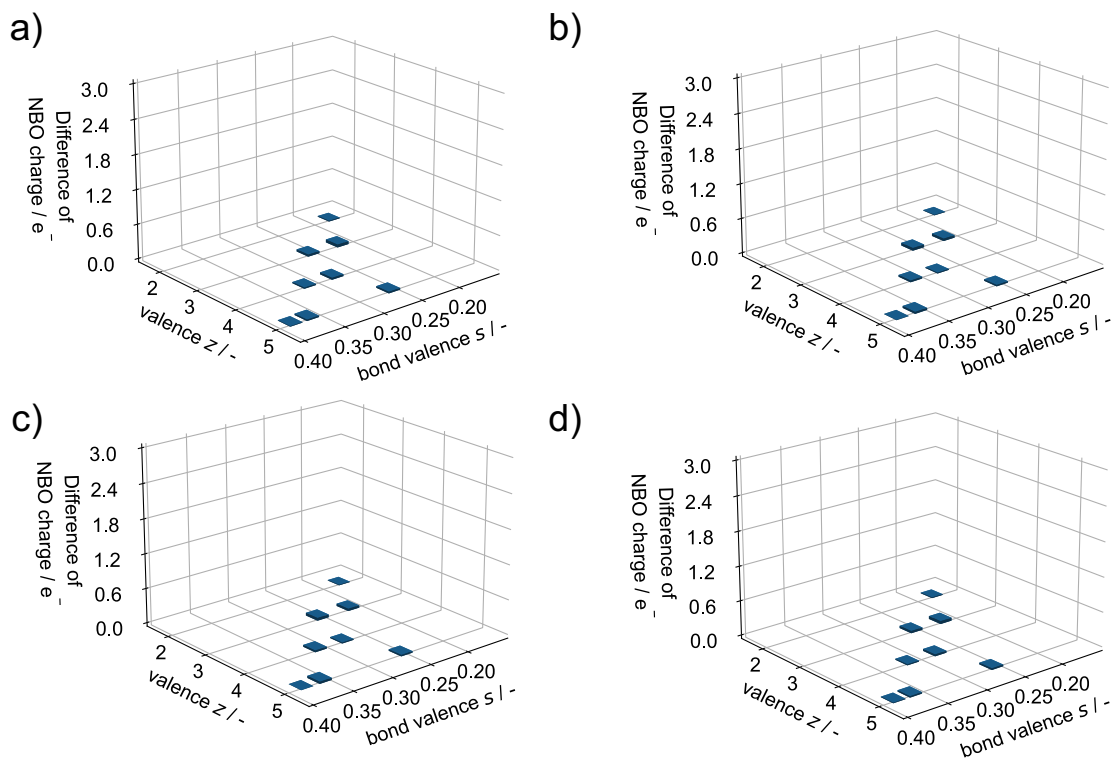

**Figure S12** Absolute error of NBO charges of XO<sub>4</sub> core structure in a)  $\alpha$ -XMo<sub>12</sub>, b)  $\alpha$ -XW<sub>12</sub>, c)  $\beta$ -XMo<sub>12</sub>, and d)  $\beta$ -XW<sub>12</sub>. The width of axis corresponding to absolute error (from 0.0 to 3.00) is adjusted to the same as the drawn width of NBO charge of XO<sub>4</sub> in Fig. S11 (from -3.00 to 0.00).

**Table S1. Adsorption energies of each adsorption site A) M=Mo, B) M=W.**

| A) |   |                                  |                                  |                                   |                                   |                                    |                                    |                                   |                                   |
|----|---|----------------------------------|----------------------------------|-----------------------------------|-----------------------------------|------------------------------------|------------------------------------|-----------------------------------|-----------------------------------|
| X  | z | $\alpha$ -isomer (eV)            |                                  | $\beta$ -isomer (eV)              |                                   |                                    |                                    |                                   |                                   |
|    |   | H <sup>+</sup> on O <sub>c</sub> | H <sup>+</sup> on O <sub>e</sub> | H <sup>+</sup> on O <sub>11</sub> | H <sup>+</sup> on O <sub>12</sub> | H <sup>+</sup> on O <sub>22e</sub> | H <sup>+</sup> on O <sub>22c</sub> | H <sup>+</sup> on O <sub>23</sub> | H <sup>+</sup> on O <sub>33</sub> |
| B  | 5 | -12.074                          | -12.134                          | -12.136                           | -12.213                           | -12.212                            | -11.978                            | -12.180                           | -12.144                           |
| Al | 5 | -12.151                          | -12.186                          | -12.192                           | -12.267                           | -12.219                            | -12.059                            | -12.232                           | -12.157                           |
| Ga | 5 | -12.178                          | -12.214                          | -12.217                           | -12.273                           | -12.226                            | -12.073                            | -12.254                           | -12.158                           |
| Si | 4 | -11.795                          | -11.796                          | -11.798                           | -11.927                           | -11.879                            | -11.679                            | -11.826                           | -11.847                           |
| Ge | 4 | -11.824                          | -11.834                          | -11.833                           | -11.947                           | -11.891                            | -11.708                            | -11.859                           | -11.857                           |
| P  | 3 | -11.471                          | -11.423                          | -11.501                           | -11.598                           | -11.532                            | -11.340                            | -11.544                           | -11.545                           |
| As | 3 | -11.500                          | -11.465                          | -11.487                           | -11.615                           | -11.546                            | -11.370                            | -11.489                           | -11.556                           |
| S  | 2 | -11.185                          | -11.128                          | -11.211                           | -11.293                           | -11.206                            | -11.034                            | -11.238                           | -11.256                           |

  

| B) |   |                                  |                                  |                                   |                                   |                                    |                                    |                                   |                                   |
|----|---|----------------------------------|----------------------------------|-----------------------------------|-----------------------------------|------------------------------------|------------------------------------|-----------------------------------|-----------------------------------|
| X  | z | $\alpha$ -isomer (eV)            |                                  | $\beta$ -isomer (eV)              |                                   |                                    |                                    |                                   |                                   |
|    |   | H <sup>+</sup> on O <sub>c</sub> | H <sup>+</sup> on O <sub>e</sub> | H <sup>+</sup> on O <sub>11</sub> | H <sup>+</sup> on O <sub>12</sub> | H <sup>+</sup> on O <sub>22e</sub> | H <sup>+</sup> on O <sub>22c</sub> | H <sup>+</sup> on O <sub>23</sub> | H <sup>+</sup> on O <sub>33</sub> |
| B  | 5 | -11.961                          | -11.972                          | -11.958                           | -12.009                           | -12.039                            | -11.726                            | -11.955                           | -11.961                           |
| Al | 5 | -12.017                          | -12.056                          | -12.043                           | -12.088                           | -12.097                            | -11.832                            | -12.051                           | -12.026                           |
| Ga | 5 | -12.034                          | -12.095                          | -12.073                           | -12.102                           | -12.111                            | -11.852                            | -12.089                           | -12.037                           |
| Si | 4 | -11.650                          | -11.664                          | -11.649                           | -11.708                           | -11.680                            | -11.431                            | -11.635                           | -11.675                           |
| Ge | 4 | -11.671                          | -11.675                          | -11.679                           | -11.740                           | -11.726                            | -11.470                            | -11.685                           | -11.698                           |
| P  | 3 | -11.303                          | -11.284                          | -11.302                           | -11.360                           | -11.320                            | -11.068                            | -11.288                           | -11.335                           |
| As | 3 | -11.357                          | -11.354                          | -11.317                           | -11.389                           | -11.349                            | -11.110                            | -11.324                           | -11.359                           |
| S  | 2 | -10.979                          | -10.957                          | -10.969                           | -11.038                           | -10.991                            | -10.742                            | -10.987                           | -11.017                           |



Table S2. Most favorable proton adsorption site using M06/Lan12DZ level.

| X  | z | $\alpha$ -isomer |                | $\beta$ -isomer  |                  |
|----|---|------------------|----------------|------------------|------------------|
|    |   | M=Mo             | M=W            | M=Mo             | M=W              |
| B  | 5 | O <sub>e</sub>   | O <sub>e</sub> | O <sub>22e</sub> | O <sub>23</sub>  |
| Al | 5 | O <sub>e</sub>   | O <sub>e</sub> | O <sub>22e</sub> | O <sub>23</sub>  |
| Ga | 5 | O <sub>e</sub>   | O <sub>e</sub> | O <sub>22e</sub> | O <sub>23</sub>  |
| Si | 4 | O <sub>e</sub>   | O <sub>e</sub> | O <sub>22e</sub> | O <sub>22e</sub> |
| Ge | 4 | O <sub>e</sub>   | O <sub>e</sub> | O <sub>22e</sub> | O <sub>22e</sub> |
| P  | 3 | O <sub>e</sub>   | O <sub>e</sub> | O <sub>22e</sub> | O <sub>12</sub>  |
| As | 3 | O <sub>e</sub>   | O <sub>e</sub> | O <sub>22e</sub> | O <sub>12</sub>  |
| S  | 2 | O <sub>e</sub>   | O <sub>e</sub> | O <sub>22e</sub> | O <sub>12</sub>  |

**Table S3. HOMO-LUMO gap comparison of some Keggin POM.**

| Composition                 | Experimental value / eV | Calculated value / eV | Reported value / eV | reference                   |
|-----------------------------|-------------------------|-----------------------|---------------------|-----------------------------|
| $\alpha$ -PW <sub>12</sub>  | 3.5                     | 4.7                   | 2.7                 | [Gao 2015]<br>[Hiskia 2001] |
| $\alpha$ -SiW <sub>12</sub> | 4.4                     | 4.3                   | 2.8                 | [Hiskia 2001]               |
| $\alpha$ -PMo <sub>12</sub> | 3.9                     | 4.8                   | -                   | [Hiskia 2001]               |

The reported values were referred to [López 2006].

Table S4. List of calculated HOMO-LUMO gaps

| Composition        | $\alpha$ -isomer / eV | $\beta$ -isomer / eV |
|--------------------|-----------------------|----------------------|
| BMo <sub>12</sub>  | 3.91                  | 3.80                 |
| AlMo <sub>12</sub> | 4.59                  | 4.51                 |
| GaMo <sub>12</sub> | 4.61                  | 4.53                 |
| SiMo <sub>12</sub> | 4.40                  | 4.32                 |
| GeMo <sub>12</sub> | 4.43                  | 4.36                 |
| PMo <sub>12</sub>  | 4.26                  | 4.16                 |
| AsMo <sub>12</sub> | 4.28                  | 4.20                 |
| SMo <sub>12</sub>  | 4.15                  | 4.02                 |
| BW <sub>12</sub>   | 4.30                  | 4.07                 |
| AlW <sub>12</sub>  | 4.89                  | 4.65                 |
| GaW <sub>12</sub>  | 4.88                  | 4.66                 |
| SiW <sub>12</sub>  | 4.79                  | 4.51                 |
| GeW <sub>12</sub>  | 4.78                  | 4.54                 |
| PW <sub>12</sub>   | 4.70                  | 4.45                 |
| AsW <sub>12</sub>  | 4.68                  | 4.44                 |
| SW <sub>12</sub>   | 4.64                  | 4.39                 |

**Table S5. Structural properties of  $\alpha$ - and  $\beta$ -XM12 prior to proton adsorption**

| Model | $\alpha$ -isomer            |                             |                             |                             |                             |                             |                             |                                           |                                           |                                           | $\beta$ -isomer                           |                                           |                                           |                                           |                                           |                                           |                                           |                                           |                                           |       |
|-------|-----------------------------|-----------------------------|-----------------------------|-----------------------------|-----------------------------|-----------------------------|-----------------------------|-------------------------------------------|-------------------------------------------|-------------------------------------------|-------------------------------------------|-------------------------------------------|-------------------------------------------|-------------------------------------------|-------------------------------------------|-------------------------------------------|-------------------------------------------|-------------------------------------------|-------------------------------------------|-------|
|       | d(X-O <sub>h</sub> )<br>(Å) | d(O <sub>h</sub> -M)<br>(Å) | d(M-O <sub>h</sub> )<br>(Å) | d(M-O <sub>h</sub> )<br>(Å) | d(O <sub>h</sub> -M)<br>(Å) | d(X-O <sub>h</sub> )<br>(Å) | d(O <sub>h</sub> -M)<br>(Å) | d(M <sub>1</sub> -O <sub>1</sub> )<br>(Å) | d(M <sub>2</sub> -O <sub>2</sub> )<br>(Å) | d(M <sub>3</sub> -O <sub>3</sub> )<br>(Å) | d(M <sub>1</sub> -O <sub>1</sub> )<br>(Å) | d(M <sub>2</sub> -O <sub>2</sub> )<br>(Å) | d(M <sub>3</sub> -O <sub>3</sub> )<br>(Å) | d(M <sub>1</sub> -O <sub>1</sub> )<br>(Å) | d(M <sub>2</sub> -O <sub>2</sub> )<br>(Å) | d(M <sub>3</sub> -O <sub>3</sub> )<br>(Å) | d(M <sub>1</sub> -O <sub>1</sub> )<br>(Å) | d(M <sub>2</sub> -O <sub>2</sub> )<br>(Å) | d(M <sub>3</sub> -O <sub>3</sub> )<br>(Å) |       |
| BMo   | 1.552                       | 2.402                       | 1.945                       | 1.927                       | 1.710                       | 1.539                       | 2.386                       | 1.535                                     | 2.401                                     | 1.950                                     | 1.710                                     | 1.934                                     | 1.932                                     | 1.917                                     | 1.939                                     | 1.711                                     | 1.943                                     | 1.948                                     | 1.925                                     | 1.709 |
| AlMo  | 1.779                       | 2.278                       | 1.966                       | 1.949                       | 1.712                       | 1.763                       | 2.282                       | 1.765                                     | 2.282                                     | 1.968                                     | 1.711                                     | 1.954                                     | 1.951                                     | 1.945                                     | 1.962                                     | 1.712                                     | 1.963                                     | 1.966                                     | 1.948                                     | 1.710 |
| SiMo  | 1.834                       | 2.257                       | 1.972                       | 1.953                       | 1.712                       | 1.637                       | 1.859                       | 1.639                                     | 2.263                                     | 1.975                                     | 1.710                                     | 1.957                                     | 1.954                                     | 1.951                                     | 1.957                                     | 1.713                                     | 1.968                                     | 1.971                                     | 1.951                                     | 1.711 |
| SiMo  | 1.950                       | 2.374                       | 1.951                       | 1.938                       | 1.700                       | 1.663                       | 2.360                       | 1.964                                     | 2.372                                     | 1.951                                     | 1.700                                     | 1.945                                     | 1.943                                     | 1.940                                     | 1.952                                     | 1.702                                     | 1.950                                     | 1.953                                     | 1.937                                     | 1.700 |
| GeMo  | 1.589                       | 2.387                       | 1.953                       | 1.934                       | 1.690                       | 1.678                       | 2.374                       | 1.674                                     | 2.385                                     | 1.949                                     | 1.691                                     | 1.941                                     | 1.939                                     | 1.936                                     | 1.943                                     | 1.690                                     | 1.945                                     | 1.948                                     | 1.931                                     | 1.690 |
| PW    | 1.589                       | 2.404                       | 1.954                       | 1.934                       | 1.690                       | 1.688                       | 2.472                       | 1.674                                     | 2.469                                     | 1.943                                     | 1.680                                     | 1.941                                     | 1.940                                     | 1.938                                     | 1.943                                     | 1.680                                     | 1.945                                     | 1.946                                     | 1.933                                     | 1.690 |
| AsMo  | 1.693                       | 2.403                       | 1.952                       | 1.942                       | 1.691                       | 1.695                       | 2.411                       | 1.686                                     | 2.398                                     | 1.951                                     | 1.681                                     | 1.949                                     | 1.948                                     | 1.936                                     | 1.951                                     | 1.682                                     | 1.953                                     | 1.953                                     | 1.941                                     | 1.691 |
| SiMo  | 1.503                       | 2.540                       | 1.941                       | 1.933                       | 1.682                       | 1.504                       | 2.549                       | 1.506                                     | 2.538                                     | 1.939                                     | 1.682                                     | 1.939                                     | 1.937                                     | 1.929                                     | 1.938                                     | 1.683                                     | 1.945                                     | 1.943                                     | 1.931                                     | 1.683 |
| BW    | 1.528                       | 2.419                       | 1.934                       | 1.918                       | 1.727                       | 1.534                       | 2.414                       | 1.534                                     | 2.413                                     | 1.934                                     | 1.727                                     | 1.925                                     | 1.921                                     | 1.910                                     | 1.936                                     | 1.728                                     | 1.935                                     | 1.937                                     | 1.917                                     | 1.727 |
| AlW   | 1.767                       | 2.283                       | 1.952                       | 1.937                       | 1.729                       | 1.770                       | 2.296                       | 1.772                                     | 2.291                                     | 1.947                                     | 1.728                                     | 1.938                                     | 1.935                                     | 1.929                                     | 1.948                                     | 1.729                                     | 1.948                                     | 1.952                                     | 1.931                                     | 1.728 |
| GeW   | 1.821                       | 2.270                       | 1.957                       | 1.942                       | 1.729                       | 1.822                       | 2.275                       | 1.825                                     | 2.269                                     | 1.951                                     | 1.729                                     | 1.940                                     | 1.938                                     | 1.933                                     | 1.952                                     | 1.729                                     | 1.952                                     | 1.956                                     | 1.934                                     | 1.728 |
| SiW   | 1.656                       | 2.387                       | 1.941                       | 1.924                       | 1.718                       | 1.657                       | 2.393                       | 1.660                                     | 2.383                                     | 1.939                                     | 1.718                                     | 1.935                                     | 1.932                                     | 1.924                                     | 1.940                                     | 1.719                                     | 1.942                                     | 1.943                                     | 1.928                                     | 1.718 |
| GeW   | 1.742                       | 2.343                       | 1.946                       | 1.934                       | 1.719                       | 1.744                       | 2.350                       | 1.747                                     | 2.340                                     | 1.939                                     | 1.719                                     | 1.939                                     | 1.937                                     | 1.931                                     | 1.944                                     | 1.720                                     | 1.947                                     | 1.949                                     | 1.932                                     | 1.719 |
| PW    | 1.564                       | 2.478                       | 1.937                       | 1.928                       | 1.710                       | 1.565                       | 2.483                       | 1.569                                     | 2.472                                     | 1.936                                     | 1.710                                     | 1.934                                     | 1.932                                     | 1.924                                     | 1.944                                     | 1.711                                     | 1.938                                     | 1.939                                     | 1.926                                     | 1.710 |
| AsW   | 1.679                       | 2.414                       | 1.943                       | 1.934                       | 1.711                       | 1.680                       | 2.421                       | 1.682                                     | 2.409                                     | 1.942                                     | 1.711                                     | 1.939                                     | 1.937                                     | 1.931                                     | 1.940                                     | 1.711                                     | 1.944                                     | 1.945                                     | 1.932                                     | 1.711 |
| SiW   | 1.502                       | 2.554                       | 1.936                       | 1.929                       | 1.704                       | 1.501                       | 2.560                       | 1.504                                     | 2.548                                     | 1.934                                     | 1.703                                     | 1.935                                     | 1.932                                     | 1.927                                     | 1.938                                     | 1.704                                     | 1.938                                     | 1.938                                     | 1.927                                     | 1.704 |

  

| Model | $\alpha$ -isomer           |                           |                            |                           |                                         |                                         |                                         |                                         |                                         |                                         | $\beta$ -isomer                         |                                         |                                         |                                         |                                         |                                         |                                         |                                         |                                         |                                         |         |
|-------|----------------------------|---------------------------|----------------------------|---------------------------|-----------------------------------------|-----------------------------------------|-----------------------------------------|-----------------------------------------|-----------------------------------------|-----------------------------------------|-----------------------------------------|-----------------------------------------|-----------------------------------------|-----------------------------------------|-----------------------------------------|-----------------------------------------|-----------------------------------------|-----------------------------------------|-----------------------------------------|-----------------------------------------|---------|
|       | MO <sub>h</sub> M<br>(deg) | OMO <sub>h</sub><br>(deg) | MO <sub>h</sub> M<br>(deg) | OMO <sub>h</sub><br>(deg) | O <sub>h</sub> MO <sub>h</sub><br>(deg) | O <sub>h</sub> XO <sub>h</sub><br>(deg) | O <sub>h</sub> XO <sub>h</sub><br>(deg) | O <sub>h</sub> MO <sub>h</sub><br>(deg) |         |
| BMo   | 120.201                    | 98.098                    | 148.251                    | 98.614                    | 109.471                                 | 109.677                                 | 109.265                                 | 97.942                                  | 99.943                                  | 101.474                                 | 97.495                                  | 99.341                                  | 98.976                                  | 97.905                                  | 100.241                                 | 119.105                                 | 142.890                                 | 118.203                                 | 152.843                                 | 119.451                                 | 148.277 |
| AlMo  | 117.039                    | 98.047                    | 151.854                    | 100.519                   | 109.471                                 | 109.463                                 | 109.480                                 | 97.778                                  | 100.545                                 | 101.796                                 | 97.465                                  | 99.740                                  | 98.814                                  | 97.911                                  | 100.784                                 | 117.125                                 | 145.695                                 | 115.143                                 | 156.381                                 | 116.739                                 | 151.940 |
| SiMo  | 116.794                    | 98.076                    | 152.374                    | 100.664                   | 109.471                                 | 109.393                                 | 109.549                                 | 97.646                                  | 100.779                                 | 102.002                                 | 97.351                                  | 99.785                                  | 98.822                                  | 97.939                                  | 100.465                                 | 116.917                                 | 146.173                                 | 114.604                                 | 156.639                                 | 116.614                                 | 152.584 |
| GeMo  | 121.138                    | 99.753                    | 152.786                    | 101.770                   | 109.471                                 | 109.608                                 | 108.335                                 | 99.638                                  | 101.567                                 | 101.567                                 | 99.478                                  | 100.975                                 | 100.610                                 | 99.614                                  | 101.733                                 | 121.969                                 | 146.025                                 | 119.691                                 | 157.909                                 | 121.405                                 | 151.727 |
| PW    | 127.146                    | 101.505                   | 152.063                    | 102.702                   | 109.471                                 | 109.700                                 | 108.242                                 | 101.399                                 | 102.827                                 | 103.649                                 | 101.159                                 | 102.449                                 | 102.321                                 | 101.431                                 | 102.868                                 | 126.912                                 | 146.911                                 | 124.026                                 | 160.074                                 | 126.089                                 | 152.812 |
| AsMo  | 125.685                    | 101.448                   | 153.399                    | 102.508                   | 109.471                                 | 109.673                                 | 108.269                                 | 101.337                                 | 102.940                                 | 103.867                                 | 101.195                                 | 102.644                                 | 102.164                                 | 101.363                                 | 103.072                                 | 125.654                                 | 147.801                                 | 122.586                                 | 161.998                                 | 124.723                                 | 155.471 |
| SiMo  | 131.584                    | 103.423                   | 153.266                    | 104.173                   | 109.471                                 | 109.793                                 | 109.148                                 | 103.045                                 | 104.286                                 | 104.864                                 | 102.651                                 | 104.145                                 | 104.195                                 | 103.379                                 | 104.107                                 | 131.441                                 | 147.663                                 | 127.524                                 | 162.935                                 | 131.473                                 | 152.868 |
| BW    | 122.160                    | 99.216                    | 148.513                    | 100.612                   | 109.471                                 | 109.754                                 | 109.187                                 | 99.353                                  | 100.683                                 | 101.645                                 | 99.256                                  | 99.988                                  | 100.434                                 | 99.083                                  | 100.816                                 | 121.312                                 | 143.463                                 | 119.770                                 | 154.948                                 | 121.892                                 | 148.502 |
| AlW   | 119.107                    | 99.137                    | 151.991                    | 101.428                   | 109.471                                 | 109.801                                 | 109.140                                 | 99.195                                  | 101.924                                 | 102.335                                 | 99.212                                  | 101.019                                 | 100.598                                 | 99.005                                  | 101.651                                 | 119.394                                 | 146.123                                 | 117.663                                 | 158.759                                 | 119.400                                 | 151.877 |
| GeW   | 118.825                    | 99.127                    | 152.578                    | 101.685                   | 109.471                                 | 109.831                                 | 109.109                                 | 99.132                                  | 101.925                                 | 102.556                                 | 99.216                                  | 101.383                                 | 100.262                                 | 99.000                                  | 101.878                                 | 119.299                                 | 146.649                                 | 117.448                                 | 159.559                                 | 119.145                                 | 152.429 |
| SiW   | 123.060                    | 100.963                   | 151.962                    | 102.504                   | 109.471                                 | 109.665                                 | 109.276                                 | 100.789                                 | 102.242                                 | 103.042                                 | 100.585                                 | 101.743                                 | 100.728                                 | 100.219                                 | 102.392                                 | 122.886                                 | 146.475                                 | 121.401                                 | 159.781                                 | 123.771                                 | 151.928 |
| GeW   | 128.898                    | 102.414                   | 152.397                    | 103.217                   | 109.471                                 | 109.708                                 | 108.234                                 | 102.287                                 | 103.385                                 | 104.095                                 | 101.806                                 | 103.215                                 | 103.289                                 | 102.385                                 | 103.940                                 | 122.447                                 | 147.388                                 | 125.100                                 | 160.942                                 | 123.000                                 | 152.961 |
| AsW   | 127.865                    | 102.413                   | 153.647                    | 103.486                   | 109.471                                 | 109.760                                 | 108.161                                 | 102.274                                 | 103.586                                 | 104.299                                 | 101.767                                 | 103.588                                 | 103.190                                 | 102.326                                 | 103.563                                 | 127.226                                 | 148.280                                 | 124.141                                 | 162.844                                 | 126.949                                 | 154.507 |
| SiW   | 133.032                    | 104.002                   | 153.556                    | 104.636                   | 109.471                                 | 109.808                                 | 108.132                                 | 103.536                                 | 104.714                                 | 105.629                                 | 102.602                                 | 104.937                                 | 104.740                                 | 103.989                                 | 104.360                                 | 132.772                                 | 148.714                                 | 128.973                                 | 163.997                                 | 132.800                                 | 153.077 |

**Table S6. Comparison of differential energies of protonation between experimental and calculated values.**

| Composition            | $\log\left(\frac{[\text{HXM}_{12}]}{[\text{XM}_{12}][\text{H}^+]}\right)$ | $\log\left(\frac{[\alpha\text{-HXM}_{12}]}{[\alpha\text{-XM}_{12}][\text{H}^+]}\right)$ | $\Delta\text{G from } \alpha\text{-PM}_{12}$<br>(experimental) / eV | $\Delta\text{G from } \alpha\text{-PM}_{12}$<br>(calculated) / eV | reference     |
|------------------------|---------------------------------------------------------------------------|-----------------------------------------------------------------------------------------|---------------------------------------------------------------------|-------------------------------------------------------------------|---------------|
| $\beta\text{-PW}_{12}$ | 1.176                                                                     | 1.398                                                                                   | 0.013                                                               | -0.057                                                            | [Ueda 2017]   |
| $\text{SMo}_{12}$      | 5.6                                                                       | 12.7                                                                                    | 0.420                                                               | 0.286                                                             | [Himeno 2005] |
| $\text{GeMo}_{12}$     | 21.1                                                                      | 12.7                                                                                    | -0.497                                                              | -0.363                                                            | [Himeno 2005] |
| $\text{GeW}_{12}$      | 14.2                                                                      | 5.6                                                                                     | -0.509                                                              | -0.372                                                            | [Himeno 2005] |
| $\text{BW}_{12}$       | 22.3                                                                      | 5.6                                                                                     | -0.988                                                              | -0.669                                                            | [Himeno 2005] |

The protonation energies were compared by differences from that of  $\alpha\text{-PM}_{12}$  since equation (1) does not include the interaction between a proton and the solvent, acetonitrile, and does not calculate correct absolute protonation energies. Considering stability and abundance of each isomer, Gibbs energies of  $\alpha$ -isomers were used in the cases of no mention of isomer in a reference. These comparisons showed that the Gibbs energies of experiment and calculation are almost confident.

References in this SI

- [Gao 2015] L.-H. Gao, J.-F. Zhang, H.-L. Wang, X.-Y. Lin, J.-M. Qi, K.-Z. Wang, *Electrochim. Acta* 2015, **166**, 215–222.
- [Hiskia 2001] A. Hiskia, A. Mylonas and E. Papaconstantinou, *Chem. Soc. Rev.* 2001, **30**, 62–69.
- [López 2006] X. López, J. A. Fernández and J. M. Poblet, *Dalton Trans.* 2006, 1162–1167.
- [Shahrnoy 2018] A. A. Shahrnoy, A. R. Mahjoub, A. Morsali, M. Dusek and V. Eigner, *Ultrasonics Sonochemistry* 2018, **40**, 174–183.
- [Ueda 2017] T. Ueda, K. Kodani, H. Ota, M. Shiro, S.-X. Guo, J. F. Boas, A. M. Bond, *Inorg. Chem.* 2017, **56**, 7, 3990–4001.
- [Himeno 2005] S. Himeno, M. Takamoto, R. Santo, A. Ichimura, *Bull. Chem. Soc. Jpn.* 2005, **78**, 95–100.
