# Supplementary material for: Factors governing the protonation of Keggin-type polyoxometalates: influence of the core structure in clusters
Source: Royal Society of Chemistry journal article supplement (doi:10.1039/d4dt00799a), 2024-01-01
Supplement: d4dt00799a2.pdf [file d4dt00799a2.pdf]

## Supporting information

### Factors Governing Protonation of Keggin-type Polyoxometalates: Influence of Core Structure in Clusters

Hiroshi Sampei<sup>a</sup>, Hiromu Akiyama<sup>a</sup>, Koki Saegusa<sup>a</sup>, Masahiro Yamaguchi<sup>a</sup>, Shuhei Ogo<sup>b,c</sup>, Hiromi Nakai<sup>d</sup>, Tadaharu Ueda<sup>\*b,c,e</sup>, and Yasushi Sekine<sup>\*a</sup>

a. Department of Applied Chemistry, Waseda University, 3-4-1, Okubo, Shinjuku, Tokyo, 169-8555, Japan, E-mail ysekine@waseda.jp

b. Department of Marine Resource Science, Faculty of Agriculture and Marine Science, Kochi University, Nankoku783-8502, Japan

c. Marine Core Research Institute, Kochi University, Nankoku 783–8502, Japan

d. Department of Chemistry and Biochemistry, Waseda University, 3-4-1, Okubo, Shinjuku, Tokyo, 169-8555, Japan

e. MEDi center, Kochi University, Kochi 780-0842, Japan

#### **This file includes:**

Figs. S1 to S12

Tables S1 to S5

#### **Other Supplementary Materials for this manuscript include the following:**

.xyz and .chk files (ZIP)

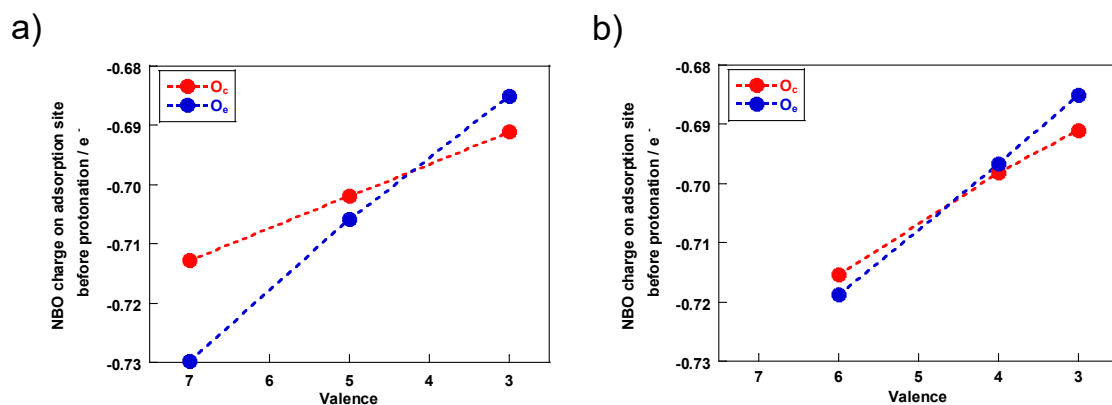

**Figure S1. NBO charge on each adsorption site before protonation in  $\alpha$ -PW12.**

**a) restricted DFT b) unrestricted DFT**

The same trend of amount of charge change as Fig. 2 was observed in not only close shell systems but also open shell systems, indicates this trend of change of  $O_e$  and  $O_c$  occurs regardless of occupation.

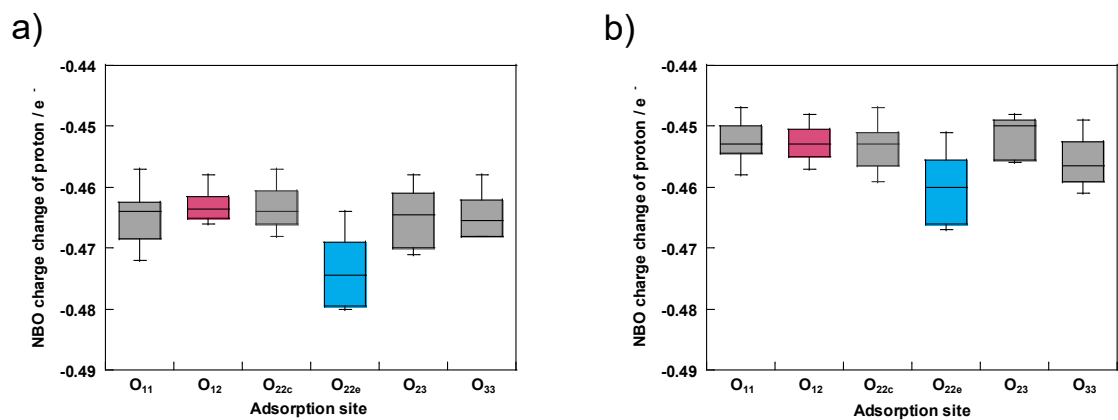

**Figure S2 4** Box plot of NBO charge change of proton upon protonation in a)  $\beta$ -XMo12 and b)  $\beta$ -XW12. The upper and lower whiskers are set as the maximum and minimum values. The plots outside the whisker are outliers.

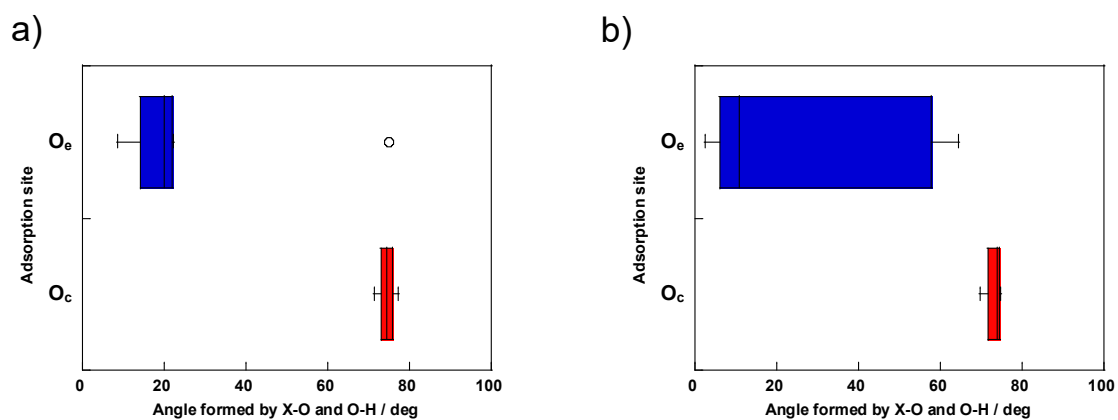

**Figure S3** Box plot illustrating the relationship between adsorption site and protonation angles, angles between X-O and O-H, in a)  $\alpha$ -XMo<sub>12</sub> and b)  $\alpha$ -XW<sub>12</sub>. The upper and lower whiskers represent the maximum and minimum values. Outlying points outside the whisker are considered as outliers.

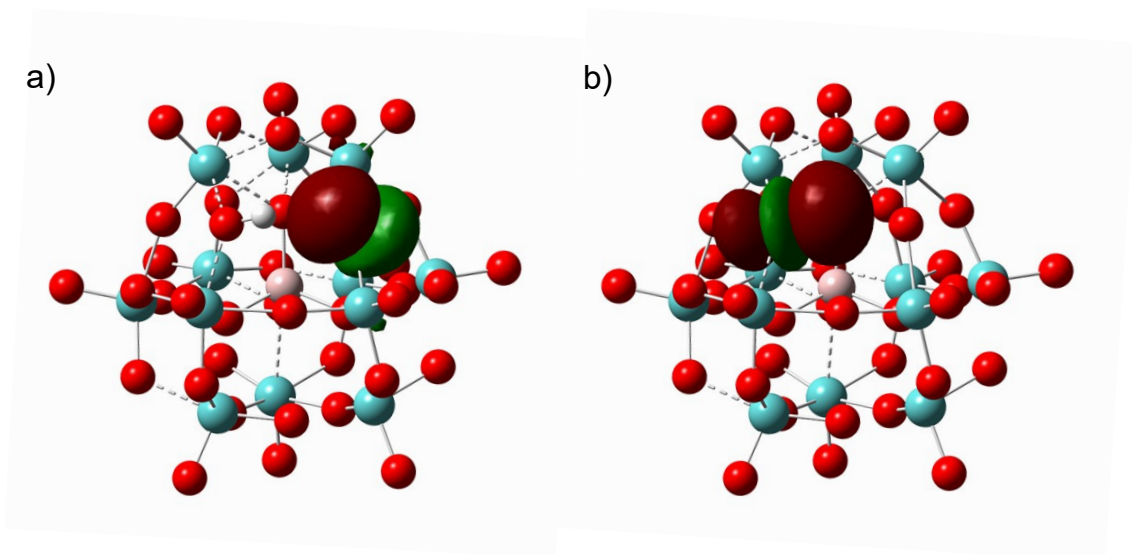

Figure S4 NBO orbitals of a) donor level and b) acceptor level for proton adsorption on  $O_{12}$  site in  $\beta\text{-AlMo}_{12}$ .

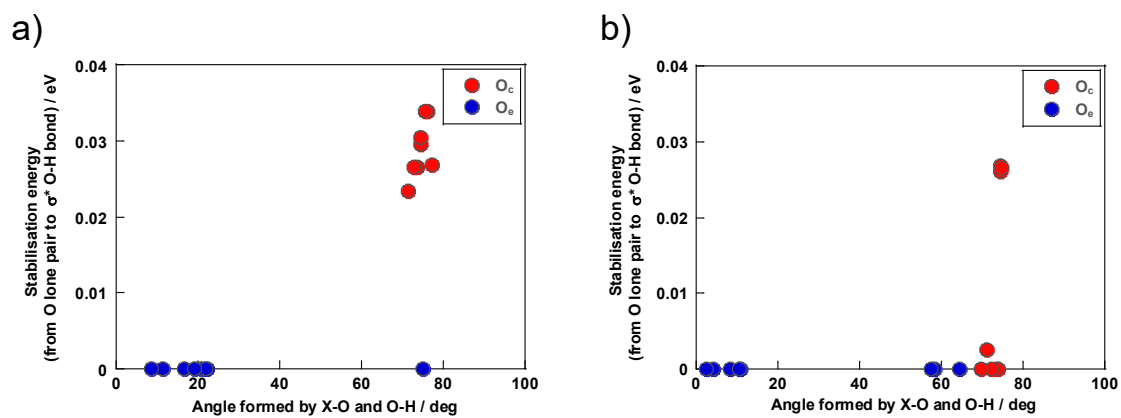

**Figure S5 Relationship between stabilization energy and the protonation angles, angles between X-O and O-H, in a)  $\alpha$ -XMo<sub>12</sub> and b)  $\alpha$ -XW<sub>12</sub>.**

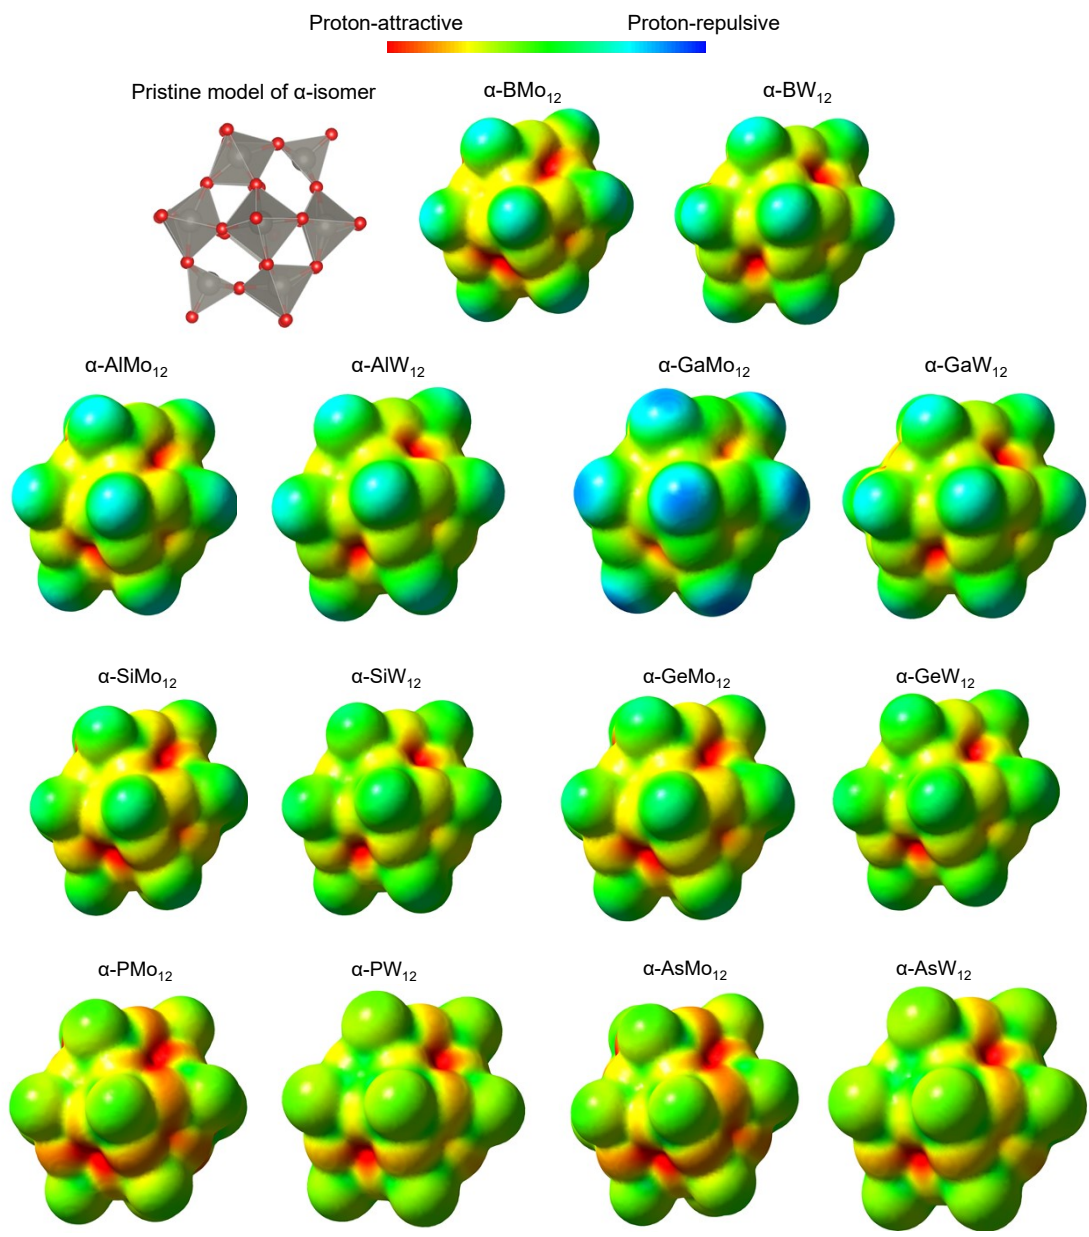

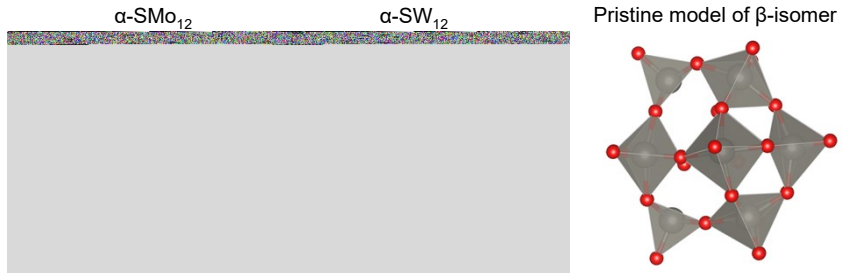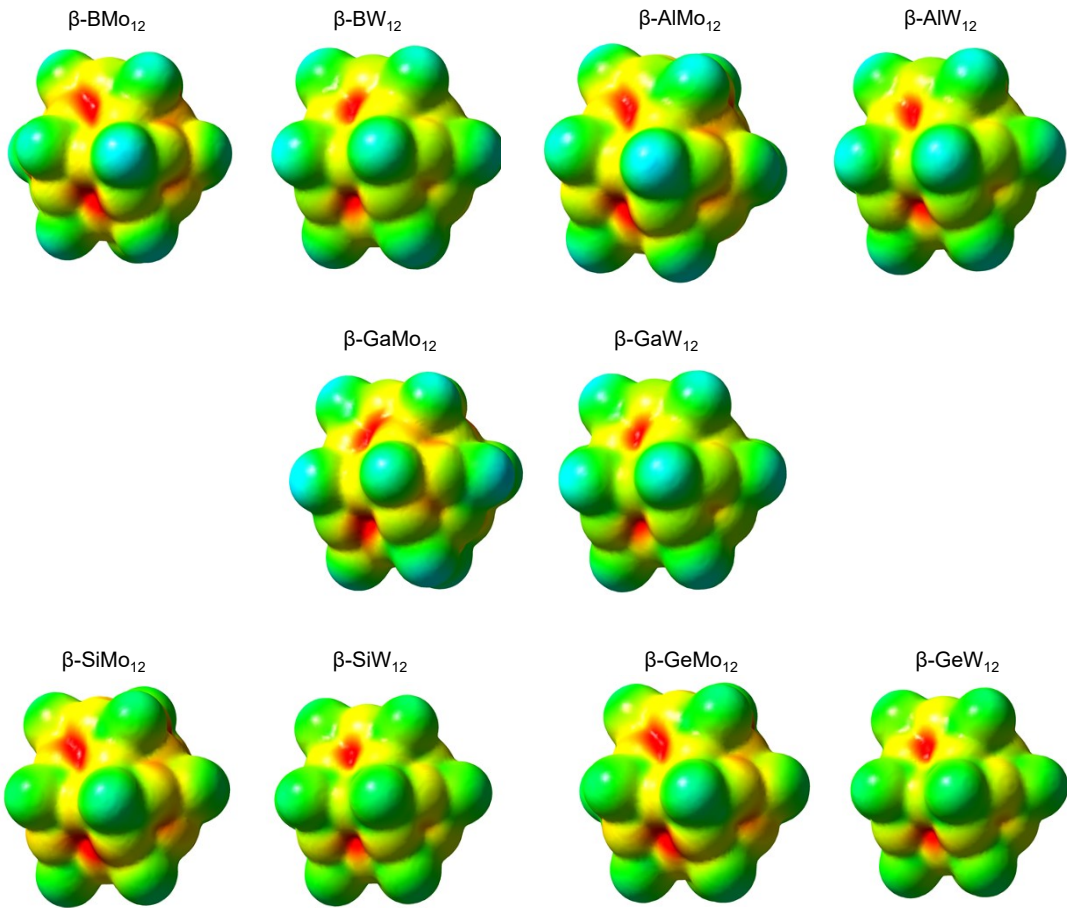



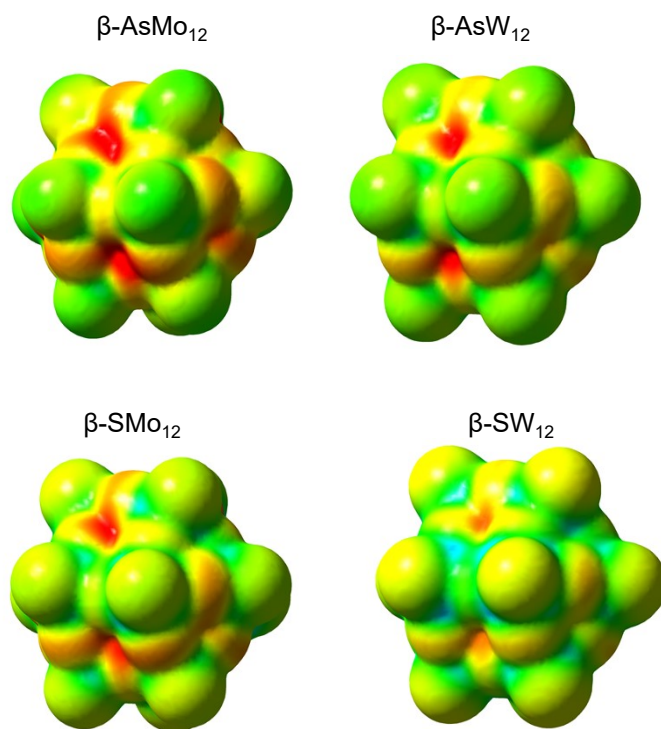

**Figure S6** MEP mappings of  $\alpha$ - and  $\beta$ - XM<sub>12</sub> except for  $\beta$ -PM<sub>12</sub>.

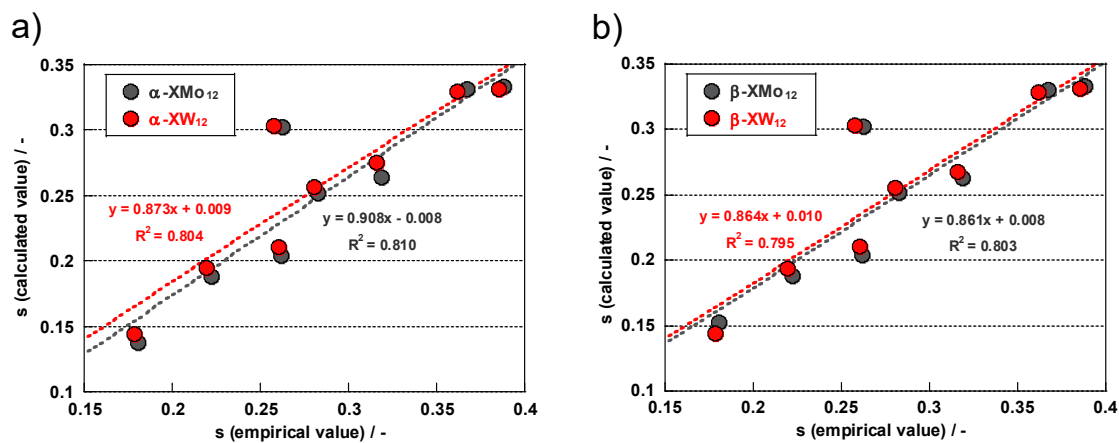

Figure S7 Correlation between empirical and calculated bond strength values on a)  $\alpha$ -XM<sub>12</sub> and b)  $\beta$ -XM<sub>12</sub>.

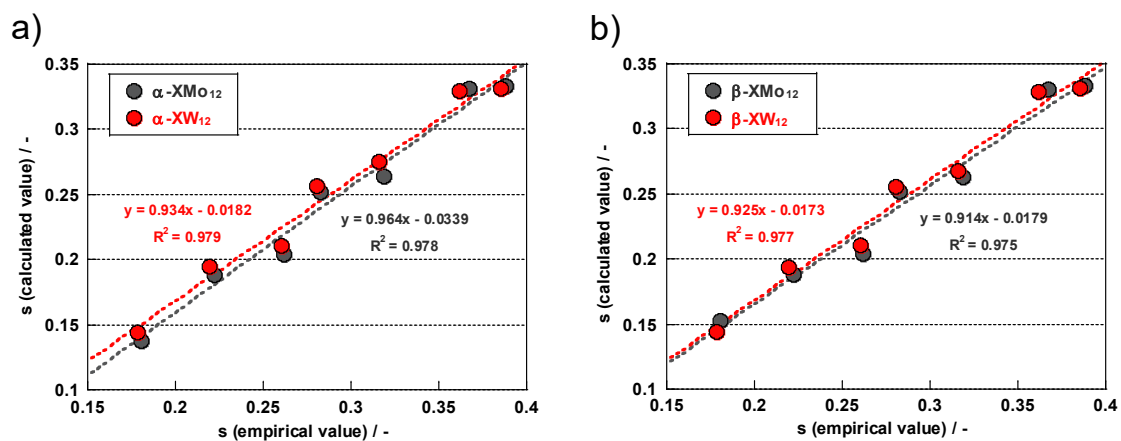

**Figure S8** Correlation between empirical and calculated bond strength values except X=B a) on  $\alpha$ -XM<sub>12</sub> and b) on  $\beta$ -XM<sub>12</sub>.

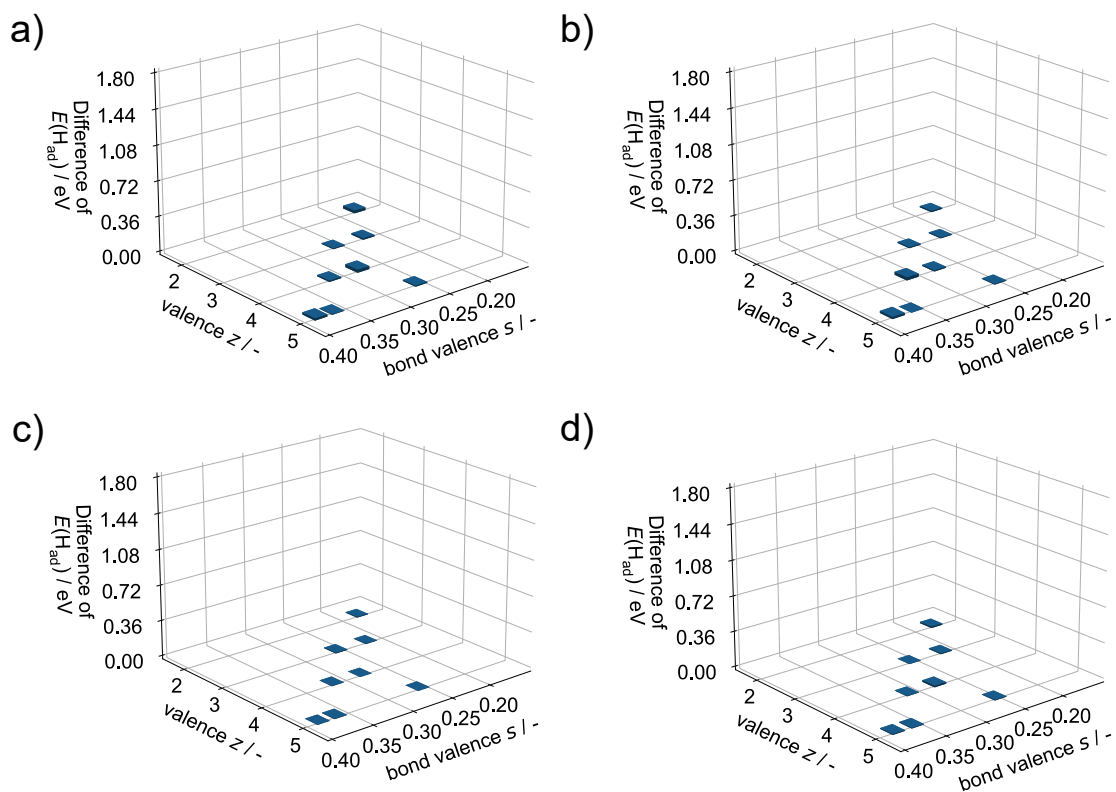

**Figure S9** Absolute error of predicted protonation energy in a)  $\alpha$ - $\text{XMo}_{12}$ , b)  $\alpha$ - $\text{XW}_{12}$ , c)  $\beta$ - $\text{XMo}_{12}$ , and d)  $\beta$ - $\text{XW}_{12}$ . The width of axis corresponding to absolute error (from 0.0 to 1.8) is adjusted to the same as the drawn width of  $E(\text{H}_{\text{ad}})$  in Fig. 8 (from -10.6 to -12.4).

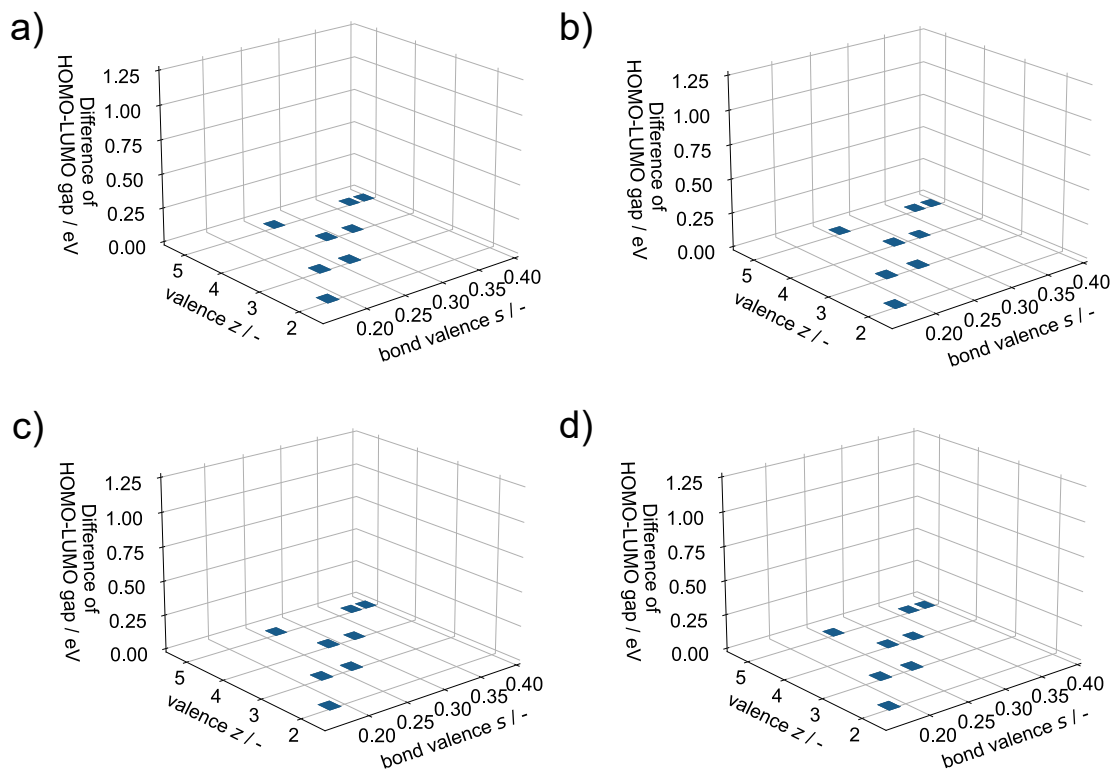

**Figure S10** Absolute error of predicted HOMO-LUMO gap in a)  $\alpha$ - $\text{XMo}_{12}$ , b)  $\alpha$ - $\text{XW}_{12}$ , c)  $\beta$ - $\text{XMo}_{12}$ , and d)  $\beta$ - $\text{XW}_{12}$ . The width of axis corresponding to absolute error (from 0.0 to 1.25) is adjusted to the same as the drawn width of HOMO-LUMO gap in Fig. 9 (from 3.75 to 5.00).

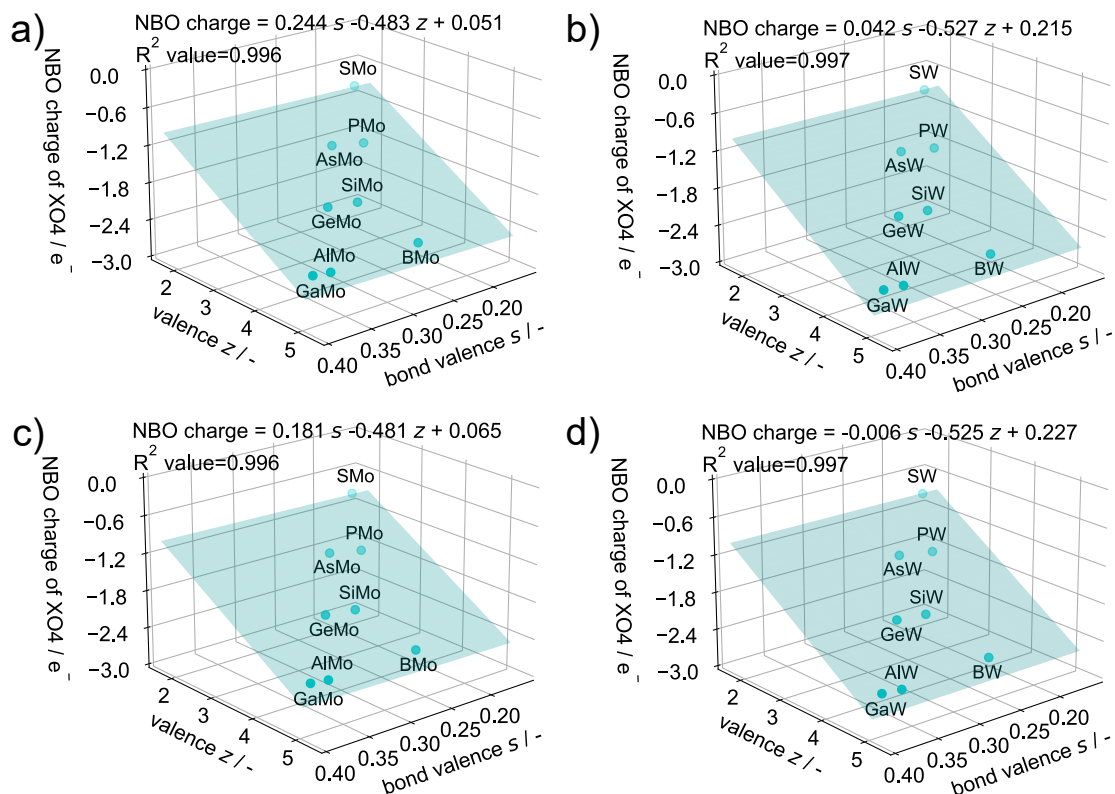

**Figure S11 Regression of NBO charges of  $XO_4$  core structure in a)  $\alpha$ - $XMo_{12}$ , b)  $\alpha$ - $XW_{12}$ , c)  $\beta$ - $XMo_{12}$ , and d)  $\beta$ - $XW_{12}$ .**

We discuss that the valences of POM are derived from charges of  $XO_4$  structure in main text.

Moreover, we evaluate the NBO charges of  $XO_4$  structures. The clear relationship between the NBO charges and governing factors for various responses suggests that the governing factors strongly involve degree of electron transfer from core structure to shell structure.

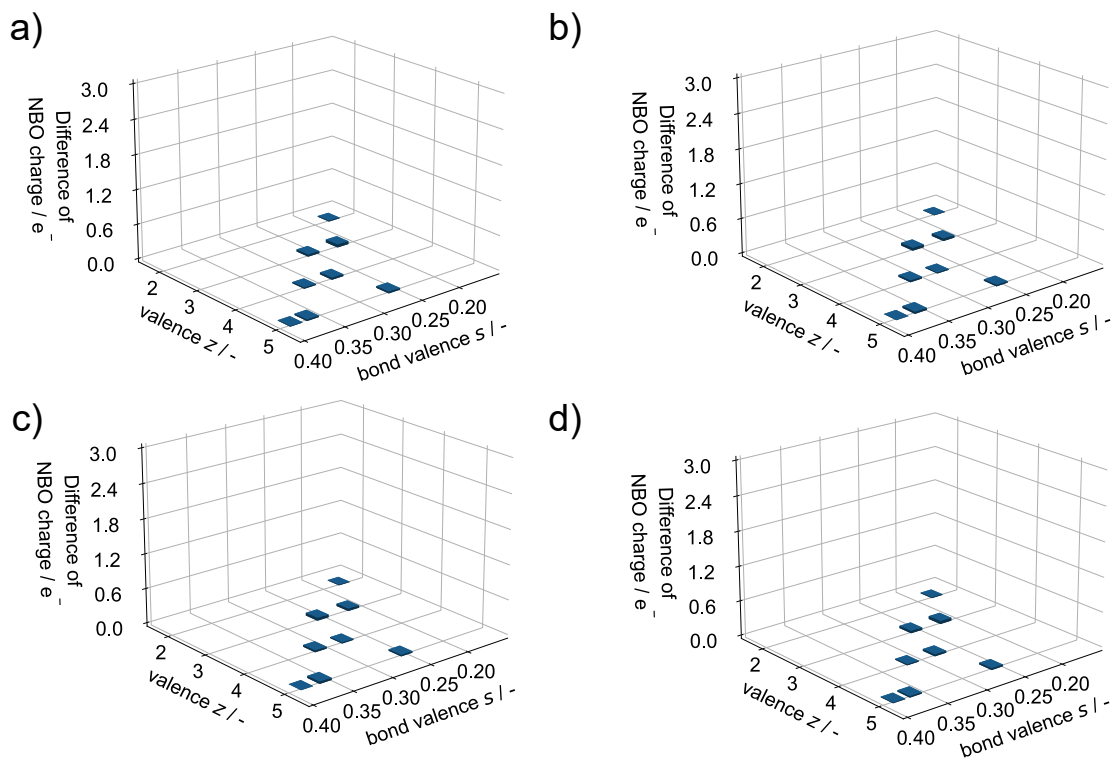

**Figure S12** Absolute error of NBO charges of  $XO_4$  core structure in a)  $\alpha$ - $XMo_{12}$ , b)  $\alpha$ - $XW_{12}$ , c)  $\beta$ - $XMo_{12}$ , and d)  $\beta$ - $XW_{12}$ . The width of axis corresponding to absolute error (from 0.0 to 3.00) is adjusted to the same as the drawn width of NBO charge of  $XO_4$  in Fig. S11 (from -3.00 to 0.00).

**Table S1. Adsorption energies of each adsorption site A) M=Mo, B) M=W.**

**A)**

| X  | z | $\alpha$ -isomer (eV)            |                                  | $\beta$ -isomer (eV)              |                                   |                                    |                                    |                                   |                                   |
|----|---|----------------------------------|----------------------------------|-----------------------------------|-----------------------------------|------------------------------------|------------------------------------|-----------------------------------|-----------------------------------|
|    |   | H <sup>+</sup> on O <sub>c</sub> | H <sup>+</sup> on O <sub>e</sub> | H <sup>+</sup> on O <sub>11</sub> | H <sup>+</sup> on O <sub>12</sub> | H <sup>+</sup> on O <sub>22e</sub> | H <sup>+</sup> on O <sub>22c</sub> | H <sup>+</sup> on O <sub>23</sub> | H <sup>+</sup> on O <sub>33</sub> |
| B  | 5 | -12.074                          | -12.134                          | -12.136                           | -12.213                           | -12.212                            | -11.978                            | -12.180                           | -12.144                           |
| Al | 5 | -12.151                          | -12.186                          | -12.192                           | -12.267                           | -12.219                            | -12.059                            | -12.232                           | -12.157                           |
| Ga | 5 | -12.178                          | -12.214                          | -12.217                           | -12.273                           | -12.226                            | -12.073                            | -12.254                           | -12.158                           |
| Si | 4 | -11.795                          | -11.796                          | -11.798                           | -11.927                           | -11.879                            | -11.679                            | -11.826                           | -11.847                           |
| Ge | 4 | -11.824                          | -11.834                          | -11.833                           | -11.947                           | -11.891                            | -11.708                            | -11.859                           | -11.857                           |
| P  | 3 | -11.471                          | -11.423                          | -11.501                           | -11.598                           | -11.532                            | -11.340                            | -11.544                           | -11.545                           |
| As | 3 | -11.500                          | -11.465                          | -11.487                           | -11.615                           | -11.546                            | -11.370                            | -11.489                           | -11.556                           |
| S  | 2 | -11.185                          | -11.128                          | -11.211                           | -11.293                           | -11.206                            | -11.034                            | -11.238                           | -11.256                           |

**B)**

| X  | z | $\alpha$ -isomer (eV)            |                                  | $\beta$ -isomer (eV)              |                                   |                                    |                                    |                                   |                                   |
|----|---|----------------------------------|----------------------------------|-----------------------------------|-----------------------------------|------------------------------------|------------------------------------|-----------------------------------|-----------------------------------|
|    |   | H <sup>+</sup> on O <sub>c</sub> | H <sup>+</sup> on O <sub>e</sub> | H <sup>+</sup> on O <sub>11</sub> | H <sup>+</sup> on O <sub>12</sub> | H <sup>+</sup> on O <sub>22e</sub> | H <sup>+</sup> on O <sub>22c</sub> | H <sup>+</sup> on O <sub>23</sub> | H <sup>+</sup> on O <sub>33</sub> |
| B  | 5 | -11.961                          | -11.972                          | -11.958                           | -12.009                           | -12.039                            | -11.726                            | -11.955                           | -11.961                           |
| Al | 5 | -12.017                          | -12.056                          | -12.043                           | -12.088                           | -12.097                            | -11.832                            | -12.051                           | -12.026                           |
| Ga | 5 | -12.034                          | -12.095                          | -12.073                           | -12.102                           | -12.111                            | -11.852                            | -12.089                           | -12.037                           |
| Si | 4 | -11.650                          | -11.664                          | -11.649                           | -11.708                           | -11.680                            | -11.431                            | -11.635                           | -11.675                           |
| Ge | 4 | -11.671                          | -11.675                          | -11.679                           | -11.740                           | -11.726                            | -11.470                            | -11.685                           | -11.698                           |
| P  | 3 | -11.303                          | -11.284                          | -11.302                           | -11.360                           | -11.320                            | -11.068                            | -11.288                           | -11.335                           |
| As | 3 | -11.357                          | -11.354                          | -11.317                           | -11.389                           | -11.349                            | -11.110                            | -11.324                           | -11.359                           |
| S  | 2 | -10.979                          | -10.957                          | -10.969                           | -11.038                           | -10.991                            | -10.742                            | -10.987                           | -11.017                           |



Table S2. Most favorable proton adsorption site using M06/Lan12DZ level.

| X  | z | $\alpha$ -isomer |                | $\beta$ -isomer  |                  |
|----|---|------------------|----------------|------------------|------------------|
|    |   | M=Mo             | M=W            | M=Mo             | M=W              |
| B  | 5 | O <sub>e</sub>   | O <sub>e</sub> | O <sub>22e</sub> | O <sub>23</sub>  |
| Al | 5 | O <sub>e</sub>   | O <sub>e</sub> | O <sub>22e</sub> | O <sub>23</sub>  |
| Ga | 5 | O <sub>e</sub>   | O <sub>e</sub> | O <sub>22e</sub> | O <sub>23</sub>  |
| Si | 4 | O <sub>e</sub>   | O <sub>e</sub> | O <sub>22e</sub> | O <sub>22e</sub> |
| Ge | 4 | O <sub>e</sub>   | O <sub>e</sub> | O <sub>22e</sub> | O <sub>22e</sub> |
| P  | 3 | O <sub>e</sub>   | O <sub>e</sub> | O <sub>22e</sub> | O <sub>12</sub>  |
| As | 3 | O <sub>e</sub>   | O <sub>e</sub> | O <sub>22e</sub> | O <sub>12</sub>  |
| S  | 2 | O <sub>e</sub>   | O <sub>e</sub> | O <sub>22e</sub> | O <sub>12</sub>  |

**Table S3. HOMO-LUMO gap comparison of some Keggin POM.**

| Composition                 | Experimental value / eV | Calculated value / eV | Reported value / eV | reference                   |
|-----------------------------|-------------------------|-----------------------|---------------------|-----------------------------|
| $\alpha$ -PW <sub>12</sub>  | 3.5                     | 4.7                   | 2.7                 | [Gao 2015]<br>[Hiskia 2001] |
| $\alpha$ -SiW <sub>12</sub> | 4.4                     | 4.3                   | 2.8                 | [Hiskia 2001]               |
| $\alpha$ -PMo <sub>12</sub> | 3.9                     | 4.8                   | -                   | [Hiskia 2001]               |

The reported values were referred to [López 2006].

**Table S4. List of calculated HOMO-LUMO gaps**

| Composition        | $\alpha$ -isomer / eV | $\beta$ -isomer / eV |
|--------------------|-----------------------|----------------------|
| BMo <sub>12</sub>  | 3.91                  | 3.80                 |
| AlMo <sub>12</sub> | 4.59                  | 4.51                 |
| GaMo <sub>12</sub> | 4.61                  | 4.53                 |
| SiMo <sub>12</sub> | 4.40                  | 4.32                 |
| GeMo <sub>12</sub> | 4.43                  | 4.36                 |
| PMo <sub>12</sub>  | 4.26                  | 4.16                 |
| AsMo <sub>12</sub> | 4.28                  | 4.20                 |
| SMo <sub>12</sub>  | 4.15                  | 4.02                 |
| BW <sub>12</sub>   | 4.30                  | 4.07                 |
| AlW <sub>12</sub>  | 4.89                  | 4.65                 |
| GaW <sub>12</sub>  | 4.88                  | 4.66                 |
| SiW <sub>12</sub>  | 4.79                  | 4.51                 |
| GeW <sub>12</sub>  | 4.78                  | 4.54                 |
| PW <sub>12</sub>   | 4.70                  | 4.45                 |
| AsW <sub>12</sub>  | 4.68                  | 4.44                 |
| SW <sub>12</sub>   | 4.64                  | 4.39                 |

Table S5. Structural properties of  $\alpha$ - and  $\beta$ -XM12 prior to proton adsorption

| Model | $\alpha$ -isomer  |                   |                  |                  |                  |                   |                   |                   |                  |                  | $\beta$ -isomer  |                   |                   |                   |                   |                   |                   |                   |                   |                   |                      |
|-------|-------------------|-------------------|------------------|------------------|------------------|-------------------|-------------------|-------------------|------------------|------------------|------------------|-------------------|-------------------|-------------------|-------------------|-------------------|-------------------|-------------------|-------------------|-------------------|----------------------|
|       | $d(X-O_h)$<br>(Å) | $d(O_h-M)$<br>(Å) | $d(MO_3)$<br>(Å) | $d(MO_2)$<br>(Å) | $d(MO_1)$<br>(Å) | $d(O_h-M)$<br>(Å) | $d(X-O_h)$<br>(Å) | $d(O_h-M)$<br>(Å) | $d(MO_3)$<br>(Å) | $d(MO_2)$<br>(Å) | $d(MO_1)$<br>(Å) | $d(M-O_1)$<br>(Å) | $d(M-O_2)$<br>(Å) | $d(M-O_3)$<br>(Å) | $d(M-O_4)$<br>(Å) | $d(M-O_5)$<br>(Å) | $d(M-O_6)$<br>(Å) | $d(M-O_7)$<br>(Å) | $d(M-O_8)$<br>(Å) | $d(M-O_9)$<br>(Å) | $d(M-O_{10})$<br>(Å) |
| BMo   | 1.532             | 2.402             | 1.945            | 1.927            | 1.710            | 1.539             | 2.396             | 1.932             | 1.917            | 1.939            | 1.710            | 1.934             | 1.932             | 1.917             | 1.943             | 1.948             | 1.925             | 1.941             | 1.925             | 1.941             | 1.709                |
| ANMo  | 1.779             | 2.278             | 1.966            | 1.949            | 1.712            | 1.763             | 2.282             | 1.765             | 2.282            | 1.968            | 1.711            | 1.954             | 1.951             | 1.945             | 1.962             | 1.712             | 1.963             | 1.966             | 1.946             | 1.961             | 1.710                |
| SiMo  | 1.634             | 2.257             | 1.972            | 1.953            | 1.712            | 1.637             | 2.281             | 1.639             | 2.253            | 1.975            | 1.710            | 1.957             | 1.954             | 1.951             | 1.952             | 1.713             | 1.968             | 1.971             | 1.951             | 1.951             | 1.711                |
| GeMo  | 1.750             | 2.304             | 1.961            | 1.946            | 1.701            | 1.753             | 2.304             | 1.964             | 1.942            | 1.959            | 1.701            | 1.955             | 1.952             | 1.949             | 1.959             | 1.963             | 1.959             | 1.947             | 1.954             | 1.947             | 1.700                |
| PtMo  | 1.598             | 2.464             | 1.943            | 1.934            | 1.690            | 1.588             | 2.472             | 1.574             | 2.468            | 1.943            | 1.690            | 1.941             | 1.940             | 1.938             | 1.943             | 1.690             | 1.944             | 1.945             | 1.945             | 1.933             | 1.690                |
| AsMo  | 1.693             | 2.403             | 1.952            | 1.942            | 1.691            | 1.685             | 2.411             | 1.686             | 2.398            | 1.951            | 1.691            | 1.948             | 1.948             | 1.935             | 1.951             | 1.692             | 1.953             | 1.953             | 1.941             | 1.941             | 1.691                |
| SiMo  | 1.503             | 2.540             | 1.941            | 1.933            | 1.682            | 1.504             | 2.540             | 1.936             | 2.536            | 1.939            | 1.682            | 1.939             | 1.937             | 1.929             | 1.938             | 1.683             | 1.945             | 1.943             | 1.931             | 1.931             | 1.683                |
| BW    | 1.528             | 2.419             | 1.934            | 1.918            | 1.727            | 1.534             | 2.414             | 1.934             | 2.413            | 1.934            | 1.727            | 1.925             | 1.921             | 1.910             | 1.936             | 1.728             | 1.935             | 1.937             | 1.917             | 1.917             | 1.727                |
| AW    | 1.767             | 2.293             | 1.952            | 1.937            | 1.729            | 1.770             | 2.296             | 1.772             | 2.291            | 1.947            | 1.728            | 1.938             | 1.935             | 1.929             | 1.948             | 1.729             | 1.948             | 1.952             | 1.931             | 1.931             | 1.728                |
| GeW   | 1.821             | 2.270             | 1.957            | 1.942            | 1.729            | 1.822             | 2.275             | 1.825             | 2.269            | 1.951            | 1.729            | 1.940             | 1.938             | 1.933             | 1.952             | 1.729             | 1.952             | 1.956             | 1.934             | 1.934             | 1.728                |
| SiW   | 1.656             | 2.387             | 1.941            | 1.929            | 1.718            | 1.657             | 2.393             | 1.660             | 2.383            | 1.939            | 1.718            | 1.935             | 1.932             | 1.924             | 1.940             | 1.719             | 1.942             | 1.943             | 1.928             | 1.928             | 1.718                |
| GeW   | 1.742             | 2.343             | 1.946            | 1.934            | 1.719            | 1.744             | 2.350             | 1.747             | 2.340            | 1.939            | 1.719            | 1.939             | 1.937             | 1.931             | 1.944             | 1.720             | 1.947             | 1.949             | 1.932             | 1.932             | 1.719                |
| PtW   | 1.564             | 2.478             | 1.937            | 1.928            | 1.710            | 1.565             | 2.483             | 1.569             | 2.472            | 1.936            | 1.710            | 1.934             | 1.932             | 1.924             | 1.935             | 1.710             | 1.938             | 1.939             | 1.926             | 1.926             | 1.710                |
| AsW   | 1.679             | 2.414             | 1.943            | 1.934            | 1.711            | 1.680             | 2.421             | 1.682             | 2.409            | 1.942            | 1.711            | 1.939             | 1.937             | 1.931             | 1.940             | 1.711             | 1.944             | 1.945             | 1.932             | 1.932             | 1.711                |
| SiW   | 1.502             | 2.554             | 1.936            | 1.929            | 1.704            | 1.501             | 2.560             | 1.934             | 2.548            | 1.934            | 1.703            | 1.935             | 1.932             | 1.927             | 1.938             | 1.704             | 1.938             | 1.938             | 1.927             | 1.927             | 1.704                |

  

| Model | $\alpha$ -isomer           |                           |                            |                           |                                         |                                         |                                         |                                         |                                         |                                         | $\beta$ -isomer                         |                                         |                                         |                                         |                                         |                                         |                                         |                                         |                                         |                                         |                                         |
|-------|----------------------------|---------------------------|----------------------------|---------------------------|-----------------------------------------|-----------------------------------------|-----------------------------------------|-----------------------------------------|-----------------------------------------|-----------------------------------------|-----------------------------------------|-----------------------------------------|-----------------------------------------|-----------------------------------------|-----------------------------------------|-----------------------------------------|-----------------------------------------|-----------------------------------------|-----------------------------------------|-----------------------------------------|-----------------------------------------|
|       | NO <sub>3</sub> M<br>(deg) | OMO <sub>6</sub><br>(deg) | MO <sub>3</sub> M<br>(deg) | OMO <sub>3</sub><br>(deg) | O <sub>3</sub> XO <sub>3</sub><br>(deg) | O <sub>3</sub> MO <sub>2</sub><br>(deg) | O <sub>3</sub> MO <sub>1</sub><br>(deg) | O <sub>3</sub> MO <sub>2</sub><br>(deg) | O <sub>3</sub> MO <sub>3</sub><br>(deg) |
| BMo   | 120.201                    | 98.098                    | 148.251                    | 98.614                    | 109.471                                 | 109.677                                 | 109.265                                 | 97.942                                  | 99.943                                  | 101.474                                 | 97.458                                  | 99.341                                  | 98.976                                  | 97.905                                  | 100.241                                 | 119.105                                 | 142.890                                 | 118.203                                 | 152.543                                 | 119.451                                 | 148.277                                 |
| ANMo  | 117.039                    | 98.047                    | 151.854                    | 100.519                   | 109.471                                 | 109.463                                 | 109.480                                 | 97.778                                  | 100.545                                 | 101.796                                 | 97.483                                  | 99.740                                  | 98.814                                  | 97.911                                  | 100.784                                 | 117.125                                 | 145.695                                 | 115.143                                 | 156.381                                 | 116.739                                 | 151.940                                 |
| SiMo  | 116.794                    | 98.076                    | 152.374                    | 100.684                   | 109.471                                 | 109.393                                 | 108.549                                 | 97.646                                  | 100.779                                 | 102.002                                 | 97.351                                  | 99.785                                  | 98.822                                  | 97.939                                  | 100.465                                 | 116.917                                 | 146.773                                 | 114.604                                 | 156.639                                 | 116.614                                 | 152.584                                 |
| GeMo  | 121.138                    | 99.753                    | 152.786                    | 101.770                   | 109.471                                 | 109.591                                 | 108.321                                 | 99.581                                  | 101.778                                 | 102.883                                 | 99.358                                  | 101.189                                 | 100.975                                 | 100.610                                 | 101.733                                 | 121.969                                 | 146.025                                 | 118.691                                 | 157.509                                 | 121.405                                 | 151.727                                 |
| PtMo  | 127.146                    | 101.505                   | 152.083                    | 102.702                   | 109.471                                 | 109.700                                 | 108.242                                 | 101.399                                 | 102.827                                 | 103.649                                 | 101.159                                 | 102.449                                 | 102.321                                 | 101.431                                 | 102.868                                 | 126.912                                 | 146.911                                 | 124.028                                 | 158.631                                 | 120.609                                 | 152.812                                 |
| AsMo  | 125.685                    | 101.448                   | 153.399                    | 102.908                   | 109.471                                 | 109.673                                 | 108.269                                 | 101.337                                 | 102.940                                 | 103.867                                 | 101.195                                 | 102.644                                 | 102.164                                 | 101.363                                 | 103.072                                 | 125.654                                 | 147.801                                 | 122.936                                 | 161.198                                 | 124.723                                 | 153.471                                 |
| SiMo  | 131.584                    | 103.423                   | 153.286                    | 104.173                   | 109.471                                 | 109.793                                 | 109.148                                 | 103.045                                 | 104.296                                 | 104.864                                 | 102.651                                 | 104.145                                 | 104.195                                 | 103.379                                 | 104.107                                 | 131.441                                 | 147.663                                 | 127.524                                 | 162.935                                 | 131.473                                 | 152.868                                 |
| BW    | 122.160                    | 99.216                    | 148.513                    | 100.612                   | 109.471                                 | 109.754                                 | 109.187                                 | 99.353                                  | 100.683                                 | 101.645                                 | 99.256                                  | 99.988                                  | 100.484                                 | 99.083                                  | 100.818                                 | 121.312                                 | 143.453                                 | 119.770                                 | 154.948                                 | 121.882                                 | 148.502                                 |
| AW    | 119.107                    | 99.137                    | 151.981                    | 101.428                   | 109.471                                 | 109.801                                 | 109.140                                 | 99.195                                  | 101.624                                 | 102.335                                 | 99.212                                  | 101.019                                 | 100.316                                 | 99.005                                  | 101.651                                 | 119.394                                 | 146.123                                 | 117.663                                 | 158.759                                 | 119.400                                 | 151.877                                 |
| GeW   | 118.825                    | 99.127                    | 152.578                    | 101.685                   | 109.471                                 | 109.615                                 | 109.109                                 | 99.132                                  | 101.925                                 | 102.562                                 | 99.216                                  | 101.363                                 | 100.262                                 | 99.000                                  | 101.878                                 | 119.299                                 | 146.649                                 | 117.448                                 | 159.559                                 | 119.145                                 | 152.429                                 |
| SiW   | 123.923                    | 100.863                   | 151.962                    | 102.204                   | 109.471                                 | 109.665                                 | 109.176                                 | 100.789                                 | 102.242                                 | 103.042                                 | 100.585                                 | 101.973                                 | 101.743                                 | 100.728                                 | 102.319                                 | 123.886                                 | 146.475                                 | 121.401                                 | 159.781                                 | 123.771                                 | 151.928                                 |
| GeW   | 123.060                    | 100.901                   | 152.985                    | 102.500                   | 109.471                                 | 109.745                                 | 109.196                                 | 100.784                                 | 102.575                                 | 103.289                                 | 100.660                                 | 102.185                                 | 101.728                                 | 100.715                                 | 102.582                                 | 124.242                                 | 147.315                                 | 120.956                                 | 160.842                                 | 123.000                                 | 152.961                                 |
| PtW   | 128.098                    | 102.414                   | 152.387                    | 103.217                   | 109.471                                 | 109.708                                 | 109.234                                 | 102.287                                 | 103.355                                 | 104.095                                 | 101.906                                 | 103.215                                 | 103.269                                 | 102.385                                 | 103.340                                 | 128.447                                 | 147.388                                 | 125.100                                 | 161.516                                 | 128.298                                 | 152.309                                 |
| AsW   | 127.265                    | 102.413                   | 153.647                    | 103.466                   | 109.471                                 | 109.760                                 | 109.161                                 | 102.274                                 | 103.366                                 | 104.239                                 | 101.767                                 | 103.388                                 | 103.190                                 | 102.326                                 | 103.563                                 | 127.226                                 | 148.200                                 | 124.141                                 | 162.544                                 | 126.949                                 | 154.367                                 |
| SiW   | 133.002                    | 104.002                   | 153.556                    | 104.636                   | 109.471                                 | 109.808                                 | 109.152                                 | 103.536                                 | 104.714                                 | 105.629                                 | 102.802                                 | 104.597                                 | 104.740                                 | 103.969                                 | 104.360                                 | 132.772                                 | 148.174                                 | 128.973                                 | 163.997                                 | 132.800                                 | 155.077                                 |

**Table S6. Comparison of differential energies of protonation between experimental and calculated values.**

| Composition            | $\log\left(\frac{[\text{HXM}_{12}]}{[\text{XM}_{12}][\text{H}^+]}\right)$ | $\log\left(\frac{[\alpha\text{-HXM}_{12}]}{[\alpha\text{-XM}_{12}][\text{H}^+]}\right)$ | $\Delta\text{G from } \alpha\text{-PM}_{12}$<br>(experimental) / eV | $\Delta\text{G from } \alpha\text{-PM}_{12}$<br>(calculated) / eV | reference     |
|------------------------|---------------------------------------------------------------------------|-----------------------------------------------------------------------------------------|---------------------------------------------------------------------|-------------------------------------------------------------------|---------------|
| $\beta\text{-PW}_{12}$ | 1.176                                                                     | 1.398                                                                                   | 0.013                                                               | -0.057                                                            | [Ueda 2017]   |
| $\text{SMo}_{12}$      | 5.6                                                                       | 12.7                                                                                    | 0.420                                                               | 0.286                                                             | [Himeno 2005] |
| $\text{GeMo}_{12}$     | 21.1                                                                      | 12.7                                                                                    | -0.497                                                              | -0.363                                                            | [Himeno 2005] |
| $\text{GeW}_{12}$      | 14.2                                                                      | 5.6                                                                                     | -0.509                                                              | -0.372                                                            | [Himeno 2005] |
| $\text{BW}_{12}$       | 22.3                                                                      | 5.6                                                                                     | -0.988                                                              | -0.669                                                            | [Himeno 2005] |

The protonation energies were compared by differences from that of  $\alpha\text{-PM}_{12}$  since equation (1) does not include the interaction between a proton and the solvent, acetonitrile, and does not calculate correct absolute protonation energies. Considering stability and abundance of each isomer, Gibbs energies of  $\alpha$ -isomers were used in the cases of no mention of isomer in a reference. These comparisons showed that the Gibbs energies of experiment and calculation are almost confident.

References in this SI

- [Gao 2015] L.-H. Gao, J.-F. Zhang, H.-L. Wang, X.-Y. Lin, J.-M. Qi, K.-Z. Wang, *Electrochim. Acta* 2015, **166**, 215–222.
- [Hiskia 2001] A. Hiskia, A. Mylonas and E. Papaconstantinou, *Chem. Soc. Rev.* 2001, **30**, 62–69.
- [López 2006] X. López, J. A. Fernández and J. M. Poblet, *Dalton Trans.* 2006, 1162–1167.
- [Shahrnoy 2018] A. A. Shahrnoy, A. R. Mahjoub, A. Morsali, M. Dusek and V. Eigner, *Ultrasonics Sonochemistry* 2018, **40**, 174–183.
- [Ueda 2017] T. Ueda, K. Kodani, H. Ota, M. Shiro, S.-X. Guo, J. F. Boas, A. M. Bond, *Inorg. Chem.* 2017, **56**, 7, 3990–4001.
- [Himeno 2005] S. Himeno, M. Takamoto, R. Santo, A. Ichimura, *Bull. Chem. Soc. Jpn.* 2005, **78**, 95–100.
